# Supplementary material for: Clinical Value of Consensus Molecular Subtypes in Colorectal Cancer: A Systematic Review and Meta-Analysis
Source: PubMed Central journal article supplement — J Natl Cancer Inst. 2021 Jun 2;114(4):503–16. doi: 10.1093/jnci/djab106 (PMC9002278; doi:10.1093/jnci/djab106), 2021-06-02
Supplement: djab106_supplementary_data.pdf [file djab106_supplementary_data.pdf]

## **Supplementary Materials - ten Hoorn S., de Back T.R., Sommeijer D.W., Vermeulen L.**

Supplementary Table 1. Study characteristics of included articles (N = 23)

Supplementary Table 2. Study characteristics of included abstracts (N = 8)

Supplementary Table 3. Prediction model Risk of Bias Assessment Tool (PROBAST)

Supplementary Table 4. Distribution of CMS labels in the local versus metastatic setting

Supplementary Table 5. Sensitivity analyses to explore heterogeneity in the pairwise prognostic CMS comparisons per survival outcome in local and metastatic disease

Supplementary Table 6. Data and weight information for the meta-analyses into median overall survival of stage IV colorectal cancer per CMS

Supplementary Table 7. Sensitivity analyses to explore heterogeneity in the pooled median overall survival per CMS in metastatic colorectal cancer

Supplementary Table 8. Distribution of CMS labels in the local versus metastatic setting with studies using classification methods with only 3 classes excluded

Supplementary Table 9. CMS classification method for each study included in the prognostic meta-analyses

Supplementary Table 10. Sensitivity analyses for phenotypic (immunohistochemical) versus RNA-based CMS labeling in the prognostic meta-analyses

Supplementary Table 11. Subgroup analyses of single group versus consensus transcriptomic profiling in the prognostic meta-analyses

Supplementary Table 12. Sensitivity analyses of single group versus consensus transcriptomic profiling in the prognostic meta-analyses

Supplementary Table 13. Subgroup analyses for differences between RNA-based CMS classification methods for the meta-analyses into pairwise CMS comparison

Supplementary Table 14. Subgroup analyses for differences between RNA-based CMS classification methods for meta-analyses into mOS times per CMS

Supplementary Table 15. Sensitivity analyses for differences between RNA-based CMS classification methods when subgroup analyses were not feasible

Supplementary Figure 1. Forest plots of pooled and single hazard ratios (HRs) for different survival outcomes per consensus molecular subtype (CMS) comparison in colorectal cancer

Supplementary Figure 2. Data and weight information for the meta-analyses on the prognostic value of the consensus molecular subtypes

Supplementary Figure 3. Forest plots of hazard ratios (HRs) for the predictive value of the consensus molecular subtypes (CMSs) for first-line systemic therapy in metastatic colorectal cancer

Supplementary Figure 4. Pearson residuals from the chi-square analysis into the distribution of the consensus molecular subtype (CMS) labels per individual study, stratified by stage

Supplementary Figure 5. Funnel plots for the prognostic meta-analyses CMS4 versus CMS1 and CMS4 versus CMS2

Supplementary Figure 6. Funnel plots for the prognostic meta-analyses CMS2 versus CMS1, CMS3 versus CMS1 and CMS3 versus CMS2

Supplementary Figure 7. Funnel plots for the prognostic meta-analyses CMS3 versus CMS2, CMS4 versus CMS3 and median overall survival per CMS

Supplementary Table 1. Study characteristics of included articles (N = 23)

| Study                                  | Design        | N    | Stages | Taxonomy        | CMS classifier | CMS classes   |                         |               |               |                         | Survival outcomes     | Treatment regimens               |
|----------------------------------------|---------------|------|--------|-----------------|----------------|---------------|-------------------------|---------------|---------------|-------------------------|-----------------------|----------------------------------|
|                                        |               |      |        |                 |                | CMS1<br>n (%) | CMS2<br>n (%)           | CMS3<br>n (%) | CMS4<br>n (%) | Unknown<br>n (%)        |                       |                                  |
| Allen et al. 2018 (1)                  | Retrospective | 820  | II-III | CMS             | CMS R package  | 143 (17.4)    | 281 (34.3)              | 115 (14.0)    | 144 (17.6)    | 137 (16.7) <sup>a</sup> | OS                    | 5-FU-based adjuvant chemotherapy |
| Budinska et al. 2013 (2)               | Retrospective | 1110 | II-III | Budinska        | NA             | C (CMS1)      | B (CMS2)                | A (CMS3)      | D/E (CMS4)    | Unknown                 | OS, RFS, SAR          | Surgery alone                    |
|                                        |               |      |        |                 |                | 129 (18.8)    | 236 (34.3)              | 66 (9.6)      | 178 (25.9)    | 79 (11.5)               |                       |                                  |
| Dienstmann et al. 2019 (3)             | Retrospective | 2636 | II-III | CMS             | CMS R package  | 507 (19.2)    | 1062 (40.3)             | 337 (12.8)    | 551 (20.9)    | 179 (6.8)               | RFS                   | NA                               |
| Dunne et al. 2016 (4)                  | Retrospective | 460  | II-III | CMS             | CMS R package  | 80 (17.4)     | 193 (42.0)              | 50 (10.9)     | 99 (21.5)     | 38 (8.3)                | RFS                   | FULV                             |
| Haasnoot et al. 2020 (5)               | Retrospective | 223  | I, III | CMS             | IHC            | CMS1          | CMS2/3                  | CMS4          | Unknown       | LNM, recurrence         | NA                    |                                  |
|                                        |               |      |        |                 |                | 16 (7.2)      | 203 (91.0) <sup>a</sup> | 4 (1.8)       | 0 (0.0)       |                         |                       |                                  |
| Jary et al. 2020 (6)                   | Retrospective | 1443 | I-III  | CMS             | CMS R package  | 258 (17.8)    | 456 (31.6)              | 182 (12.6)    | 393 (27.2)    | 154 (10.7)              | OS                    | NA                               |
| Kwon et al. 2017 (7)                   | Retrospective | 101  | III    | CMS             | CMS R package  | 10 (9.9)      | 38 (37.6)               | 13 (12.9)     | 19 (18.8)     | 21 (20.8)               | OS, RFS               | NA                               |
| Li et al. 2020 (8)                     | Retrospective | 165  | II     | CMS             | IHC            | CMS1          | CMS2/3                  | CMS4          | Unknown       | OS, RFS                 | Adjuvant chemotherapy |                                  |
|                                        |               |      |        |                 |                | 30 (18.2)     | 119 (72.1)              | 16 (9.7)      | 0 (0.0)       |                         |                       |                                  |
| Piskol et al. 2019 (9)<br>AVANT Cohort | Retrospective | 1062 | III    | CMS             | NanoString     | 209 (19.7)    | 509 (47.9)              | 60 (5.6)      | 215 (20.2)    | 69 (6.5)                | OS, PFS, RFS, SAR     | NA                               |
| Roepman et al. 2014 (10)               | Retrospective | 731  | II-III | Roepman         | NA             | A-type (CMS1) | B-type (CMS2)           | C-type (CMS4) | Unknown       | OS, DMFS                | 5-FU                  |                                  |
|                                        |               |      |        |                 |                | 182 (24.9)    | 434 (59.4) <sup>a</sup> | 115 (15.7)    | 0 (0.0)       |                         |                       |                                  |
| Shinto et al. 2020 (11)                | Retrospective | 232  | II     | CMS             | CMS R package  | 18 (7.8)      | 87 (37.5)               | 13 (5.6)      | 114 (49.1)    | 0 (0.0)                 | RFS                   | NA                               |
| Song et al. 2016 (12)                  | Retrospective | 1729 | II-III | Sadanandam      | NA             | IF (CMS1)     | EC/TA (CMS2)            | GL (CMS3)     | SL (CMS4)     | Unknown                 | RFS                   | FOLFOX                           |
|                                        |               |      |        |                 |                | 405 (23.4)    | 578 (33.4)              | 142 (8.2)     | 478 (27.6)    | 126 (7.3)               |                       |                                  |
| Williams et al. 2018 (13)              | Prospective   | 142  | II-III | CMS             | CMS R package  | 20 (14.1)     | 52 (36.6)               | 33 (23.2)     | 7 (4.9)       | 30 (21.1)               | RFS                   | NA                               |
| De Sousa e Melo et al. 2013 (14)       | Retrospective | 90   | I-IV   | De Sousa e Melo | NA             | CMS1          | CMS2/3                  | CMS4          | Unknown       | RFS, RR                 | Cetuximab monotherapy |                                  |
|                                        |               |      |        |                 |                | 22 (24.4)     | 44 (48.9)               | 24 (26.7)     | 0 (0.0)       |                         |                       |                                  |
| Guinney et al. 2015 (15)               | Retrospective | 3962 | I-IV   | CMS             | CMS R package  | 555 (14.0)    | 1466 (37.0)             | 515 (13.0)    | 911 (23.0)    | 515 (13.0)              | OS, RFS, SAR          | NA                               |
| Trinh et al. 2017 (25)<br>LUMC Cohort  | Retrospective | 240  | I-IV   | CMS             | IHC            | CMS1          | CMS2/3                  | CMS4          | Unknown       | RFS                     | NA                    |                                  |
|                                        |               |      |        |                 |                | 35 (14.6)     | 102 (42.5)              | 103 (42.9)    | 0 (0.0)       |                         |                       |                                  |

(continued)

Supplementary Table 1 (continued)

| Study                                                | Design        | N   | Stages | Taxonomy | CMS classifier | CMS classes     |                      |                        |                    |                        | Survival outcomes                                      | Treatment regimens                                              |
|------------------------------------------------------|---------------|-----|--------|----------|----------------|-----------------|----------------------|------------------------|--------------------|------------------------|--------------------------------------------------------|-----------------------------------------------------------------|
|                                                      |               |     |        |          |                | CMS1<br>n (%)   | CMS2<br>n (%)        | CMS3<br>n (%)          | CMS4<br>n (%)      | Unknown<br>n (%)       |                                                        |                                                                 |
| Cremolini et al. 2019 (16)                           | Retrospective | 9   | IV     | CMS      | NanoString     | 1 (11.1)        | 3 (33.3)             | 0 (0.0)                | 4 (44.4)           | 1 (11.1)               | RR                                                     | Irinotecan +/- anti-EGFR                                        |
| Del Rio et al. 2017 (17)                             | Retrospective | 143 | IV     | CMS      | CMS R package  | 15 (10.5)       | 29 (20.3)            | 24 (16.8)              | 36 (25.2)          | 39 (27.3) <sup>a</sup> | OS, PFS, RR                                            | FOLFOX<br>FOLFIRI-based<br>FOLFIRI + bevacizumab                |
| Kawazoe et al. 2020 (18)                             | Prospective   | 23  | IV     | CMS      | CMS R package  | 5 (21.7)        | 6 (26.1)             | 3 (13.0)               | 6 (26.1)           | 3 (13.0)               | irORR                                                  | Napabucasin + pembrolizumab                                     |
| Lenz et al. 2019 (19)                                | Retrospective | 663 | IV     | CMS      | NanoString     | 104 (15.7)      | 242 (36.5)           | 68 (10.3)              | 167 (25.2)         | 82 (12.4)              | OS, PFS                                                | FOLFOX/FOLFIRI + cetuximab<br>FOLFOX/FOLFIRI + bevacizumab      |
| Lenz et al. 2020 (20)                                | Retrospective | 231 | IV     | CMS      | CMS R package  | 4 (1.7)         | 64 (27.7)            | 2 (0.9)                | 119 (51.5)         | 42 (18.2)              | OS, PFS                                                | Nintedanib<br>Placebo                                           |
| Mooi et al. 2018 (21)                                | Retrospective | 237 | IV     | CMS      | CMS R package  | 42 (17.7)       | 113 (47.7)           | 28 (11.8)              | 54 (22.8)          | 0 (0.0)                | OS, PFS                                                | Capecitabin<br>Capecitabin, mitomycin C and bevacizumab         |
| Morris et al. 2020 (22)                              | Retrospective | 331 | IV     | CMS      | NanoString     | 17 (5.1)        | 111 (33.5)           | 25 (7.6)               | 178 (53.8)         | 0 (0.0)                | OS                                                     | NA                                                              |
| Okita et al. 2018 (23)                               | Retrospective | 193 | IV     | CMS      | CMS R package  | 21 (10.9)       | 53 (27.5)            | 69 (35.8) <sup>a</sup> | 50 (25.9)          | 0 (0.0)                | OS, PFS, RR, DCR                                       | Oxaliplatin-based chemotherapy<br>Irinotecan-based chemotherapy |
| Piskol et al. 2019 (9)<br>Procured and Dareck Cohort | Retrospective | 234 | IV     | CMS      | NanoString     | 37 (15.8)       | 115 (49.1)           | 4 (1.7)                | 64 (27.4)          | 14 (6.0)               | OS, PFS, RFS, SAR                                      | NA                                                              |
| Schlicker et al. 2020 (24)                           | Retrospective | 51  | IV     | CMS      | CMS R package  | 1 (2.0)         | 16 (31.4)            | 2 (3.9)                | 32 (62.7)          | 0 (0.0)                | OS                                                     | NA                                                              |
| Stintzing et al. 2019 (25)                           | Retrospective | 514 | IV     | CMS      | CMS R package  | 61 (11.9)       | 162 (31.5)           | 66 (12.8)              | 149 (29.0)         | 76 (14.8)              | OS, PFS, RR                                            | FOLFIRI + cetuximab<br>FOLFIRI + bevacizumab                    |
| Trinh et al. 2017 (26)<br>CAIRO2 Cohort              | Retrospective | 339 | IV     | CMS      | IHC            | CMS1<br>8 (2.3) | CMS2/3<br>161 (47.5) | CMS4<br>170 (50.1)     | Unknown<br>0 (0.0) | OS, RR                 | CAPOX + bevacicimab<br>CAPOX + bevacicimab + cetuximab |                                                                 |
| Woolston et al. 2019 (27)                            | Prospective   | 25  | IV     | CMS      | CMS caller     | 4 (16.0)        | 13 (52.0)            | 3 (12.0)               | 5 (20.0)           | 0 (0.0)                | OS, PFS, RR                                            | Cetuximab monotherapy                                           |

<sup>a</sup> Aberrant number of labels based on high pearson residuals (>8, data not shown)

Abbreviations: 5-FU, 5-fluorouracil; CAPOX, capecitabine and oxaliplatin; CMS, consensus molecular subtypes; DCR, disease control rate; DMFS, distant metastasis-free survival; EC/TA, enterocyte / transit-amplifying; FOLFIRI, fluorouracil, leucovorin, and irinotecan; FOLFOX, fluorouracil, leucovorin, and oxaliplatin; FULV, fluorouracil and leucovorin; GL, goblet-like; IF, inflammatory; IHC, immunohistochemistry; LNM, lymph node metastasis; NA, not applicable; OS, overall survival; PFS, progression-free survival; RR, response rate; RFS, relapse-free survival; SAR, survival after relapse; SL, stem-like.

Supplementary Table 2. Study characteristics of included abstracts (N = 8)

| Study                        | Conference | Design        | N    | Stage | Taxonomy   | CMS classifier                         | CMS classes          |               |                        |                         |                  | Survival outcomes | Treatment regimens                                                                           |
|------------------------------|------------|---------------|------|-------|------------|----------------------------------------|----------------------|---------------|------------------------|-------------------------|------------------|-------------------|----------------------------------------------------------------------------------------------|
|                              |            |               |      |       |            |                                        | CMS1<br>n (%)        | CMS2<br>n (%) | CMS3<br>n (%)          | CMS4<br>n (%)           | Unknown<br>n (%) |                   |                                                                                              |
| Marisa et al. 2017 (28)      | ASCO       | Retrospective | 1781 | III   | CMS        | NanoString                             | 297 (16.7)           | 585 (32.8)    | 68 (3.8)               | 770 (43.2) <sup>a</sup> | 61 (3.4)         | OS                | FOLFOX + cetuximab                                                                           |
| Pogue-Geile et al. 2019 (29) | ASCO       | Retrospective | 590  | III   | Sadanandam | NA                                     | NR                   | NR            | NR                     | NR                      | NR               | OS                | 5-FU +/- FOLFOX                                                                              |
| Borelli et al. 2020 (30)     | ASCO       | Retrospective | 426  | IV    | CMS        | NanoString                             | 4 (0.9) <sup>a</sup> | 142 (33.3)    | 58 (13.6)              | 222 (52.1) <sup>a</sup> | 0 (0.0)          | OS, PFS           | FOLFOX + bevacizumab                                                                         |
| Gomez et al. 2020 (31)       | EMSO       | Retrospective | 195  | IV    | CMS        | IHC                                    | CMS1                 | CMS2/3        |                        | CMS4                    | Unknown          | OS, TTP           | FOLFOXIRI + bevacizumab<br>Oxaliplatin-based +/- anti-EGFR<br>Irinotecan-based +/- anti-EGFR |
|                              |            |               |      |       |            |                                        | 8 (3.7)              | 109 (49.8)    | 78 (35.6)              | 0 (0.0)                 |                  |                   |                                                                                              |
| Lam et al. 2020 (32)         | ASCO       | Retrospective | 117  | IV    | CMS        | NanoString                             | 7 (6.0)              | 43 (36.8)     | 8 (6.8)                | 55 (47.0)               | 4 (3.4)          | OS                | NA                                                                                           |
| Lee et al. 2019 (33)         | ASCO       | Retrospective | 68   | IV    | CMS        | Multinomial elastic net CMS classifier | 8 (11.8)             | 43 (63.2)     | 3 (4.4)                | 14 (20.6)               | 0 (0.0)          | OS, PFS, TTP      | NA                                                                                           |
| Sarshekeh et al. 2020 (34)   | ASCO       | Prospective   | 53   | IV    | CMS        | NanoString                             | 0 (0.0)              | 0 (0.0)       | 0 (0.0)                | 53 (100.0)              | NR               | OS, PFS, RR       | Bintrafusp alfa (M7824) + RT                                                                 |
| Yuki et al. 2020 (35)        | ASCO       | Retrospective | 308  | IV    | CMS        | CMS R package                          | 47 (15.3)            | 72 (23.4)     | 99 (32.1) <sup>a</sup> | 90 (29.0)               | 0 (0.0)          | OS, PFS           | mFOLFOX/CAPOX + bevacizumab<br>S-1 + Irinotecan + bevacizumab                                |

<sup>a</sup> Aberrant number of labels based on high pearson residuals (>8), data not shown)

Abbreviations: AJCC-TRG, American Joint Committee on Cancer - tumor regression grading; ASCO, American Society of Clinical Oncology; CAPOX, capecitabine and oxaliplatin; CMS, consensus molecular subtypes; DCR, disease control rate; FOLFOX, 5-fluorouracil, leucovorin, and oxaliplatin; FOLFOXIRI, 5-fluorouracil, leucovorin, oxaliplatin and irinotecan; IHC, immunohistochemistry; JCO, Journal of Clinical Oncology; mFOLFOX modified FOLFOX; NR, not reported; NA, not available; OS, overall survival; PFS, progression free survival; RR, response rate; TTP, time to progression

Supplementary Table 3. Prediction model Risk of Bias Assessment Tool (PROBAST)

| Study                            | ROB          |            |         |          | Applicability |            |         | Overall |               | Analysis   |            |
|----------------------------------|--------------|------------|---------|----------|---------------|------------|---------|---------|---------------|------------|------------|
|                                  | Participants | Predictors | Outcome | Analysis | Participants  | Predictors | Outcome | ROB     | Applicability | Prognostic | Predictive |
| Allen et al. 2018 (1)            | +            | +          | +       | +        | +             | +          | ?       | +       | ?             | no         | yes        |
| Budinska et al. 2013 (2)         | +            | +          | +       | +        | +             | -          | ?       | +       | -             | yes        | no         |
| Cremolini et al. 2019 (16)       | +            | +          | +       | -        | -             | -          | -       | -       | -             | no         | yes        |
| De Sousa e Melo et al. 2013 (14) | +            | +          | +       | +        | +             | -          | ?       | +       | -             | no         | yes        |
| Del Rio et al. 2017 (17)         | +            | +          | +       | +        | +             | +          | +       | +       | +             | yes        | yes        |
| Dienstmann et al. 2019 (3)       | +            | +          | +       | +        | +             | -          | +       | +       | -             | yes        | no         |
| Dunne et al. 2016 (4)            | +            | +          | +       | +        | +             | ?          | +       | +       | ?             | no         | yes        |
| Guinney et al. 2015 (15)         | +            | +          | +       | +        | +             | +          | +       | +       | +             | yes        | no         |
| Haasnoot et al. 2020 (5)         | +            | +          | +       | +        | +             | -          | +       | +       | -             | yes        | no         |
| Jary et al. 2020 (6)             | +            | +          | +       | +        | +             | +          | +       | +       | +             | yes        | no         |
| Kawazoe et al. 2020 (18)         | +            | +          | +       | -        | +             | +          | +       | -       | +             | no         | yes        |
| Kwon et al. 2017 (7)             | +            | +          | +       | -        | +             | +          | ?       | -       | ?             | yes        | no         |
| Lenz et al. 2019 (19)            | +            | +          | +       | +        | +             | -          | +       | +       | -             | yes        | yes        |
| Lenz et al. 2020 (20)            | +            | +          | +       | +        | +             | +          | +       | +       | +             | yes        | yes        |
| Li et al. 2020 (8)               | +            | +          | +       | +        | +             | -          | +       | +       | -             | yes        | yes        |
| Mooi et al. 2018 (21)            | +            | +          | +       | +        | +             | +          | +       | +       | +             | yes        | yes        |
| Morris et al. 2020 (22)          | +            | +          | +       | +        | +             | -          | +       | +       | -             | yes        | no         |
| Okita et al. 2018 (23)           | +            | +          | +       | +        | -             | +          | +       | +       | -             | yes        | yes        |
| Piskol et al. 2019 (9)           | +            | +          | +       | +        | +             | -          | +       | +       | -             | yes        | no         |
| Roepman et al. 2014 (10)         | +            | +          | +       | +        | +             | -          | ?       | +       | -             | yes        | yes        |
| Schlicker et al. 2020 (24)       | +            | +          | +       | -        | +             | +          | +       | -       | +             | yes        | no         |
| Shinto et al. 2020 (11)          | +            | +          | +       | +        | +             | +          | +       | +       | +             | yes        | no         |
| Song et al. 2016 (12)            | +            | +          | +       | +        | +             | -          | +       | +       | -             | yes        | yes        |
| Stintzing et al. 2019 (25)       | +            | +          | +       | +        | +             | +          | +       | +       | +             | yes        | yes        |
| Trihn et al. 2017 (26)           | +            | +          | +       | +        | +             | -          | +       | +       | -             | no         | yes        |
| Williams et al. 2018 (13)        | +            | +          | +       | +        | +             | +          | +       | +       | +             | yes        | no         |
| Woolston et al. 2019 (27)        | +            | +          | +       | -        | -             | -          | +       | -       | -             | no         | yes        |

Abbreviations: PROBAST, Prediction model Risk of Bias Assessment Tool; ROB, risk of bias.

+ indicates low ROB/low applicability concern; - indicates high ROB/high applicability concern; ? Indicates unclear ROB/unclear applicability concern

Supplementary Table 4. Distribution of CMS labels in the local versus metastatic setting.

|            | N  | CMS1 |      | CMS2 |      | CMS3 |      | CMS4 |      | Unknown |     |
|------------|----|------|------|------|------|------|------|------|------|---------|-----|
|            |    | n    | %    | n    | %    | n    | %    | n    | %    | n       | %   |
| Local      | 16 | 2334 | 18.7 | 4986 | 39.9 | 1079 | 8.6  | 3205 | 25.6 | 894     | 7.2 |
| Metastatic | 17 | 386  | 9.9  | 1388 | 35.5 | 462  | 11.8 | 1415 | 36.1 | 261     | 6.7 |

Pearson's Chi-squared test: X-squared = 304.65, df = 4, P value < 0.001

Abbreviations: CMS, consensus molecular subtypes; N, Number of studies; n, number of patients

Supplementary Table 5. Sensitivity analyses to explore heterogeneity in the pairwise prognostic CMS comparisons per survival outcome in local and metastatic disease.

| Meta-analyses    | Original values                |                                   | Adjusted values sensitivity analyses |                                  | Excluded studies           |
|------------------|--------------------------------|-----------------------------------|--------------------------------------|----------------------------------|----------------------------|
|                  | HR (95% CI)                    | Heterogeneity                     | HR (95% CI)                          | Heterogeneity                    | Reference                  |
| CMS4 versus CMS1 |                                |                                   |                                      |                                  |                            |
| OS local         | 3.28 (1.27 to 8.47), P = 0.01  | I <sup>2</sup> = 83.0%, P < 0.001 | 4.54 (2.68 to 7.70), P < 0.001       | I <sup>2</sup> = 0.0%, P = 0.65  | Jary et al. 2020 (6)       |
| PFS metastatic   | 0.52 (0.38 to 0.75), P < 0.001 | I <sup>2</sup> = 57.1%, P = 0.03  | 0.46 (0.35 to 0.61), P < 0.001       | I <sup>2</sup> = 0.0%, P = 0.71  | Lenz et al. 2019 (19)      |
| RFS local        | 1.84 (1.35 to 2.51), P < 0.001 | I <sup>2</sup> = 58.6%, P = 0.047 | 2.18 (1.69 to 2.81), P < 0.001       | I <sup>2</sup> = 0.0%, P = 0.46  | Dienstmann et al. 2019 (3) |
| CMS2 versus CMS1 |                                |                                   |                                      |                                  |                            |
| OS metas         | 0.33 (0.23 to 0.48), P < 0.001 | I <sup>2</sup> = 62.8%, P = 0.009 | 0.30 (0.22 to 0.41), P < 0.001       | I <sup>2</sup> = 31.8%, P = 0.19 | Lenz et al. 2019 (19)      |
| PFS metas        | 0.53 (0.35 to 0.81), P = 0.003 | I <sup>2</sup> = 74.7%, P < 0.001 | 0.72 (0.54 to 0.96), P = 0.03        | I <sup>2</sup> = 38.4%, P = 0.17 | Piskol et al. 2019 (9)     |
| CMS3 versus CMS1 |                                |                                   |                                      |                                  |                            |
| OS metastatic    | 0.55 (0.32 to 0.93), P = 0.03  | I <sup>2</sup> = 74.1%, P = 0.004 | 0.45 (0.32 to 0.62), P < 0.001       | I <sup>2</sup> = 0.0%, P = 0.72  | Lenz et al. 2019 (19)      |
| PFS metastatic   | 0.89 (0.60 to 1.34), P = 0.59  | I <sup>2</sup> = 55.2%, P = 0.06  | 1.02 (0.71 to 1.48), P = 0.91        | I <sup>2</sup> = 39.8%, P = 0.17 | Okita et al. 2018 (23)     |
| CMS4 versus CMS3 |                                |                                   |                                      |                                  |                            |
| RFS local        | 1.23 (0.82 to 1.84), P = 0.32  | I <sup>2</sup> = 50.3%, P = 0.09  | 1.30 (0.94 to 1.79), P = 0.12        | I <sup>2</sup> = 35.6%, P = 0.20 | Williams et al. 2019 (13)  |

Abbreviations: 95% CI, 95% confidence interval; CMS, consensus molecular subtypes; HR, Hazard ratio; RFS, relapse-free survival; PFS, progression-free survival; OS, overall survival

Supplementary Table 6. Data and weight information for the meta-analyses into median overall survival of stage IV colorectal cancer per CMS

| CMS | Study                                        | N   | Classification method | Median OS in months (95% CI) | Weight (%) | Pooled median OS in months (95% CI) |
|-----|----------------------------------------------|-----|-----------------------|------------------------------|------------|-------------------------------------|
| 1   | Okita et al, 2018 (anti-EGFR cohort) (23)    | 14  | CMS R package         | 5.70 (1.10 to ND)            | 14.3       | 11.20 (7.69 to 14.71)               |
|     | Piskol et al, 2018 (DARECK cohort) (9)       | 14  | NanoString            | 5.80 (3.70 to ND)            | 17.7       |                                     |
|     | Mooi et al, 2018 (21)                        | 42  | CMS R package         | 8.80 (6.50 to 16.00)         | 13.1       |                                     |
|     | Piskol et al, 2018 (PROCURED cohort) (9)     | 9   | NanoString            | 10.00 (3.00 to ND)           | 10.8       |                                     |
|     | Guinney et al, 2015 (15)                     | 7   | CMS R package         | 13.00 (5.10 to ND)           | 9.7        |                                     |
|     | Lenz et al, 2019 (19)                        | 104 | NanoString            | 15.00 (11.70 to 22.40)       | 12.6       |                                     |
|     | Stintzing et al, 2019 (25)                   | 61  | CMS R package         | 15.90 (11.00 to 20.80)       | 13.8       |                                     |
|     | Okita et al, 2018 (chemotherapy cohort) (23) | 21  | CMS R package         | 21.40 (13.30 to 35.50)       | 6.2        |                                     |
|     | Morris et al, 2020 (22)                      | 17  | NanoString            | 24.80 (19.90 to 59.20)       | 1.8        |                                     |
| 2   | Mooi et al, 2018 (21)                        | 113 | CMS R package         | 24.20 (19.10 to 27.40)       | 14.2       | 36.39 (30.44 to 42.33)              |
|     | Okita et al, 2018 (anti-EGFR cohort) (23)    | 39  | CMS R package         | 26.60 (13.70 to 34.80)       | 10.1       |                                     |
|     | Stintzing et al, 2019 (25)                   | 164 | CMS R package         | 29.00 (26.70 to 31.40)       | 14.9       |                                     |
|     | Guinney et al, 2015 (15)                     | 46  | CMS R package         | 38.90 (27.00 to ND)          | 9.5        |                                     |
|     | Lam et al, 2020 (32)                         | 43  | NanoString            | 40.00 (34.00 to 51.00)       | 11.4       |                                     |
|     | Lenz et al, 2019 (19)                        | 242 | NanoString            | 40.30 (36.10 to 43.10)       | 14.5       |                                     |
|     | Morris et al, 2020 (22)                      | 111 | NanoString            | 46.00 (36.60 to 53.80)       | 11.5       |                                     |
|     | Piskol et al, 2018 (PROCURED cohort) (9)     | 47  | NanoString            | 46.00 (32.00 to 67.00)       | 6.4        |                                     |
|     | Okita et al, 2018 (chemotherapy cohort) (23) | 53  | CMS R package         | 48.10 (34.80 to 65.60)       | 7.5        |                                     |
| 3   | Okita et al, 2018 (anti-EGFR cohort) (23)    | 27  | CMS R package         | 13.40 (5.80 to 15.40)        | 15.3       | 21.89 (15.92 to 27.85)              |
|     | Mooi et al, 2018 (21)                        | 28  | CMS R package         | 17.60 (11.30 to 24.60)       | 14.5       |                                     |
|     | Stintzing et al, 2019 (25)                   | 65  | CMS R package         | 18.60 (15.40 to 21.70)       | 16.8       |                                     |
|     | Guinney et al, 2015 (15)                     | 10  | CMS R package         | 20.00 (11.70 to ND)          | 13.2       |                                     |
|     | Morris et al, 2020 (22)                      | 25  | NanoString            | 22.30 (16.90 to 35.20)       | 11.9       |                                     |
|     | Lenz et al, 2019 (19)                        | 68  | NanoString            | 24.30 (16.40 to 29.00)       | 14.6       |                                     |
|     | Okita et al, 2018 (chemotherapy cohort) (23) | 69  | CMS R package         | 38.70 (30.60 to 45.60)       | 13.8       |                                     |

(continued)



Supplementary Table 6 (continued)

| CMS | Study                                        | N   | Classification method | Median OS in months (95% CI) | Weight (%) | Pooled median OS in months (95% CI) |
|-----|----------------------------------------------|-----|-----------------------|------------------------------|------------|-------------------------------------|
|     | Piskol et al, 2018 (DARECK cohort) (9)       | 29  | NanoString            | 13.10 (9.00 to NA)           | 11.1       |                                     |
|     | Okita et al, 2018 (anti-EGFR cohort) (23)    | 23  | CMS R package         | 17.00 (13.20 to 24.90)       | 10.3       |                                     |
|     | Mooi et al, 2018 (21)                        | 54  | CMS R package         | 21.40 (15.80 to 23.10)       | 11.1       |                                     |
|     | Stintzing et al, 2019 (25)                   | 148 | CMS R package         | 24.80 (22.60 to 27.10)       | 11.6       |                                     |
| 4   | Piskol et al, 2018 (PROCURED cohort) (9)     | 25  | NanoString            | 27.00 (19.00 to NA)          | 9.6        | 26.79 (21.07 to 32.50)              |
|     | Guinney et al, 2015 (15)                     | 41  | CMS R package         | 28.00 (22.00 to 52.00)       | 5.6        |                                     |
|     | Lam et al, 2020 (32)                         | 55  | NanoString            | 28.00 (21.00 to 33.00)       | 10.4       |                                     |
|     | Lenz et al, 2019 (19)                        | 167 | NanoString            | 31.40 (26.30 to 36.90)       | 10.7       |                                     |
|     | Morris et al, 2020 (22)                      | 178 | NanoString            | 37.10 (33.20 to 44.30)       | 10.5       |                                     |
|     | Okita et al, 2018 (chemotherapy cohort) (23) | 50  | CMS R package         | 44.00 (33.00 to 50.50)       | 9.1        |                                     |

Abbreviations: CMS, consensus molecular subtypes; N, number of patients included in the cohort; OS, overall survival; 95% CI, 95% confidence interval; ND, not determined

Supplementary Table 7. Sensitivity analyses to explore heterogeneity in the pooled median overall survival per CMS in metastatic colorectal cancer.

| Meta-analyses | Original values        |                              | Adjusted values sensitivity analyses |                              | Excluded studies                      |
|---------------|------------------------|------------------------------|--------------------------------------|------------------------------|---------------------------------------|
|               | Months (95% CI)        | Heterogeneity                | Months (95% CI)                      | Heterogeneity                | Reference                             |
| CMS1          | 11.20 (7.69 to 14.71)  | $I^2 = 72.8\%$ , $P < 0.001$ | 11.44 (7.61 to 15.27)                | $I^2 = 50.4\%$ , $P = 0.06$  | Piskol 2019 (9); Stintzing 2019 (25)  |
| CMS2          | 36.39 (30.44 to 42.33) | $I^2 = 87.1\%$ , $P < 0.001$ | 37.87 (31.23 to 44.52)               | $I^2 = 78.5\%$ , $P < 0.001$ | Mooi 2018 (21); Lenz 2019 (19)        |
| CMS3          | 21.89 (15.92 to 27.85) | $I^2 = 81.4\%$ , $P < 0.001$ | 18.77 (15.80 to 21.75)               | $I^2 = 29.1\%$ , $P = 0.22$  | Okita 2018 (23)                       |
| CMS4          | 26.79 (21.07 to 32.50) | $I^2 = 89.0\%$ , $P < 0.001$ | 28.00 (23.75 to 32.25)               | $I^2 = 75.4\%$ , $P < 0.001$ | Okita 2018 (2x) (23); Piskol 2019 (9) |

Abbreviations: 95% CI, 95% confidence interval; CMS, consensus molecular subtypes; HR, Hazard ratio; RFS, relapse-free survival; PFS, progression-free survival; OS, overall survival

Supplementary Table 8. Distribution of CMS labels in the local versus metastatic setting with studies using classification methods with only 3 classes excluded<sup>a</sup>.

|            | N  | CMS1 |      | CMS2 |      | CMS3 |      | CMS4 |      | Unknown |     |
|------------|----|------|------|------|------|------|------|------|------|---------|-----|
|            |    | n    | %    | n    | %    | n    | %    | n    | %    | n       | %   |
| Local      | 11 | 2076 | 18.7 | 4077 | 36.7 | 1079 | 9.7  | 2968 | 26.8 | 894     | 8.1 |
| Metastatic | 16 | 378  | 10.6 | 1227 | 34.3 | 462  | 12.9 | 1245 | 34.8 | 261     | 7.3 |

Pearson's Chi-squared test: X-squared = 201.15, df = 4, P value < 0.001

Abbreviations: CMS, consensus molecular subtypes; N, Number of studies; n, number of patients

<sup>a</sup>Immunohistochemistry, De Sousa subtypes and Roepman subtypes

Supplementary Table 9. CMS classification method for each study included in the prognostic meta-analyses

| Setting        | CMS4 versus CMS1                                                    |                             | CMS3 versus CMS1                                 |                             | CMS2 versus CMS1                                                    |                                    |
|----------------|---------------------------------------------------------------------|-----------------------------|--------------------------------------------------|-----------------------------|---------------------------------------------------------------------|------------------------------------|
| Local OS       | Li et al., 2020 (8)                                                 | Immunohistochemistry        | Jary et al., 2020 (6)                            | CMS R package               | Budinska et al., 2013 (2)                                           | Budinska classification            |
|                | Roepman et al., 2014 (10)                                           | Roepman classification      |                                                  |                             | Piskol et al., 2019 AVANT cohort (9)                                | NanoString                         |
|                | Piskol et al., 2019 AVANT cohort (9)<br>Jary et al., 2020 (6)       | NanoString<br>CMS R package |                                                  |                             | Jary et al., 2020 (6)                                               | CMS R package                      |
| Local RFS      | Li et al., 2020 (8)                                                 | Immunohistochemistry        | Shinto et al., 2020 (11)                         | CMS R package               | Shinto et al., 2020 (11)                                            | CMS R package                      |
|                | Song et al., 2016 Discovery cohort (12)                             | Sadanandam classification   | Williams et al., 2018 (13)                       | CMS R package               | Williams et al., 2018 (13)                                          | CMS R package                      |
|                | Song et al., 2016 Validation cohort (12)                            | Sadanandam classification   | Dienstmann et al., 2019 (3)                      | CMS R package               | Budinska et al., 2013 (2)                                           | Budinska classification            |
|                | Dienstmann et al., 2019 (3)<br>Piskol et al., 2019 AVANT cohort (9) | CMS R package<br>NanoString |                                                  |                             | Dienstmann et al., 2019 (3)<br>Piskol et al., 2019 AVANT cohort (9) | CMS R package<br>NanoString        |
| Local SAR      | Piskol et al., 2019 AVANT cohort (9)                                | NanoString                  |                                                  |                             | Budinska et al., 2013 (2)                                           | Budinska classification            |
| Metastatic OS  | Lenz et al., 2019 (19)<br>Mooi et al., 2018 (21)                    | NanoString<br>CMS R package | Lenz et al., 2019 (19)<br>Mooi et al., 2018 (21) | NanoString<br>CMS R package | Lenz et al., 2019 (19)<br>Mooi et al., 2018 (21)                    | NanoString<br>CMS R package        |
|                | Piskol et al., 2019 DARECK cohort (9)                               | NanoString                  | Okita et al., 2018 (23) chemotherapy cohort      | CMS R package               | Piskol et al., 2019 (9) DARECK cohort                               | NanoString                         |
|                | Piskol et al., 2019 PROCURED cohort (9)                             | NanoString                  | Okita et al., 2018 (23) anti-EGFR cohort         | CMS R package               | Piskol et al., 2019 (9) PROCURED cohort                             | NanoString                         |
|                | Okita et al., 2018 (23) chemotherapy cohort                         | CMS R package               | Del Rio et al., 2017 (17)                        | CMS R package               | Okita et al., 2018 (23) chemotherapy cohort                         | CMS R package                      |
|                | Okita et al., 2018 (23) anti-EGFR cohort                            | CMS R package               |                                                  |                             | Okita et al., 2018 (23) anti-EGFR cohort                            | CMS R package                      |
|                | Del Rio et al., 2017 (17)                                           | CMS R package               |                                                  |                             | Del Rio et al., 2017 (17)                                           | CMS R package                      |
|                |                                                                     |                             |                                                  |                             | Lee et al., 2019 (33)                                               | Multinomial elastic net classifier |
| Metastatic PFS | Lenz et al., 2019 (19)<br>Mooi et al., 2018 (21)                    | NanoString<br>CMS R package | Lenz et al., 2019 (19)<br>Mooi et al., 2018 (21) | NanoString<br>CMS R package | Lenz et al., 2019 (19)<br>Mooi et al., 2018 (21)                    | NanoString<br>CMS R package        |
|                | Piskol et al., 2019 DARECK cohort (9)                               | NanoString                  | Okita et al., 2018 (23) chemotherapy cohort      | CMS R package               | Piskol et al., 2019 (9) DARECK cohort                               | NanoString                         |
|                | Piskol et al., 2019 (9) PROCURED cohort                             | NanoString                  | Okita et al., 2018 (23) anti-EGFR cohort         | CMS R package               | Piskol et al., 2019 (9) PROCURED cohort                             | NanoString                         |
|                | Okita et al., 2018 (23) chemotherapy cohort                         | CMS R package               | Del Rio et al., 2017 (17)                        | CMS R package               | Okita et al., 2018 chemotherapy cohort (23)                         | CMS R package                      |
|                | Okita et al., 2018 (23) anti-EGFR cohort                            | CMS R package               |                                                  |                             | Okita et al., 2018 anti-EGFR cohort (23)                            | CMS R package                      |
|                | Del Rio et al., 2017 (17)                                           | CMS R package               |                                                  |                             | Del Rio et al., 2017 (17)                                           | CMS R package                      |

(continued)

Supplementary Table 9 (continued)

| Setting        | CMS4 versus CMS2                                                                                                                                        |                                                                                   | CMS3 versus CMS2                            |                         | CMS4 versus CMS3                                     |                                            |
|----------------|---------------------------------------------------------------------------------------------------------------------------------------------------------|-----------------------------------------------------------------------------------|---------------------------------------------|-------------------------|------------------------------------------------------|--------------------------------------------|
| Local OS       | Budinska et al., 2013 (Subgroup D) (2)<br>Budinska et al., 2013 (Subgroup E) (2)<br>Piskol et al., 2019 AVANT cohort (9)                                | Budinska classification<br>Budinska classification<br>NanoString                  | Budinska et al., 2013 (2)                   | Budinska classification |                                                      |                                            |
|                | Shinto et al., 2020 (11)                                                                                                                                | CMS R package                                                                     | Shinto et al., 2020 (11)                    | CMS R package           | Shinto et al., 2020 (11)                             | CMS R package                              |
| Local RFS      | Song et al., 2016 (12) Discovery cohort                                                                                                                 | Sadanandam classification                                                         | Williams et al., 2018 (13)                  | CMS R package           | Williams et al., 2018 (13)<br>Song et al., 2016 (12) | CMS R package<br>Sadanandam classification |
|                | Song et al., 2016 (12) Validation cohort                                                                                                                | Sadanandam classification                                                         | Budinska et al., 2013 (2)                   | Budinska classification | Discovery cohort<br>Song et al., 2016 (12)           | Sadanandam classification                  |
|                | Williams et al., 2018 (13)                                                                                                                              | CMS R package                                                                     | Dienstmann et al., 2019 (3)                 | CMS R package           | Validation cohort<br>Dienstmann et al., 2019 (3)     | CMS R package                              |
|                | Budinska et al., 2013 (2) (Subgroup D)<br>Budinska et al., 2013 (2) (Subgroup E)<br>Dienstmann et al., 2019 (3)<br>Piskol et al., 2019 (9) AVANT cohort | Budinska classification<br>Budinska classification<br>CMS R package<br>NanoString |                                             |                         |                                                      |                                            |
| Local SAR      | Budinska et al., 2013 (2) (Subgroup D)<br>Budinska et al., 2013 (2) (Subgroup E)<br>Piskol et al., 2019 (9) AVANT cohort                                | Budinska classification<br>Budinska classification<br>NanoString                  | Budinska et al., 2013 (2)                   | Budinska classification |                                                      |                                            |
| Metastatic OS  | Schlicker et al., 2020 (24)                                                                                                                             | CMS R package                                                                     | Okita et al., 2018 (23) chemotherapy cohort | CMS R package           | Okita et al., 2018 (23) chemotherapy cohort          | CMS R package                              |
|                | Piskol et al., 2019 (9) DARECK cohort                                                                                                                   | NanoString                                                                        | Okita et al., 2018 (23) anti-EGFR cohort    | CMS R package           | Okita et al., 2018 (23) anti-EGFR cohort             | CMS R package                              |
|                | Piskol et al., 2019 (9) PROCURED cohort                                                                                                                 | NanoString                                                                        | Del Rio et al., 2017 (17)                   | CMS R package           | Del Rio et al., 2017 (17)                            | CMS R package                              |
|                | Okita et al., 2018 (23) chemotherapy cohort                                                                                                             | CMS R package                                                                     |                                             |                         |                                                      |                                            |
|                | Okita et al., 2018 (23) anti-EGFR cohort                                                                                                                | CMS R package                                                                     |                                             |                         |                                                      |                                            |
|                | Del Rio et al., 2017 (17)                                                                                                                               | CMS R package                                                                     |                                             |                         |                                                      |                                            |
|                | Piskol et al., 2019 (9) DARECK cohort                                                                                                                   | NanoString                                                                        | Okita et al., 2018 (23) chemotherapy cohort | CMS R package           | Okita et al., 2018 (23) chemotherapy cohort          | CMS R package                              |
|                | Piskol et al., 2019 (9) PROCURED cohort                                                                                                                 | NanoString                                                                        | Okita et al., 2018 (23) anti-EGFR cohort    | CMS R package           | Okita et al., 2018 (23) anti-EGFR cohort             | CMS R package                              |
| Metastatic PFS | Okita et al., 2018 (23) chemotherapy cohort                                                                                                             | CMS R package                                                                     | Del Rio et al., 2017 (17)                   | CMS R package           | Del Rio et al., 2017 (17)                            | CMS R package                              |
|                | Okita et al., 2018 (23) anti-EGFR cohort                                                                                                                | CMS R package                                                                     |                                             |                         |                                                      |                                            |
|                | Del Rio et al., 2017 (17)                                                                                                                               | CMS R package                                                                     |                                             |                         |                                                      |                                            |

Abbreviations: CMS, consensus molecular subtypes; OS, overall survival; PFS, progression free survival; RFS, relapse free survival; SAR, survival after relapse

Supplementary Table 10. Sensitivity analyses for phenotypic (immunohistochemical) versus RNA-based CMS labeling in the prognostic meta-analyses

| Meta-analyses    | Original values<br>HR (95% CI) | Adjusted values sensitivity analyses<br>HR (95% CI) | Excluded study<br>Reference |
|------------------|--------------------------------|-----------------------------------------------------|-----------------------------|
| CMS4 versus CMS1 |                                |                                                     |                             |
| OS local         | 3.28 (1.27 to 8.47), P = 0.01  | 2.72 (0.98 to 7.52), P = 0.05                       | Li et al., 2020 (8)         |
| RFS local        | 1.84 (1.35 to 2.51), P < 0.001 | 1.83 (1.30 to 2.59), P < 0.001                      | Li et al., 2020 (8)         |

Abbreviations: CMS, consensus molecular subtypes; HR, hazard ratio; OS, overall survival; RFS, relapse free survival

Supplementary Table 11. Subgroup analyses of single group versus consensus transcriptomic profiling in the prognostic meta-analyses<sup>a</sup>.

| Subgroup analyses          |                                |                         |                                         |                                         |
|----------------------------|--------------------------------|-------------------------|-----------------------------------------|-----------------------------------------|
| Meta-analyses              | Original values<br>HR (95% CI) | Subgroups               | Values subgroup analyses<br>HR (95% CI) | Difference between subgroups<br>P value |
| CMS4 versus 1<br>RFS local | 1.84 (1.35 to 2.51), P < 0.001 | Sadanandam labels (n=2) | 2.44 (1.82 to 3.28), P < 0.001          | 0.003                                   |
|                            |                                | CMS labels (n=3)        | 1.41 (1.15 to 1.72), P < 0.001          |                                         |
| CMS4 versus 2<br>RFS local | 1.46 (1.29 to 1.64), P < 0.001 | Sadanandam labels (n=2) | 1.42 (1.12 to 1.82), P = 0.005          | 0.76                                    |
|                            |                                | Budinska labels (n=2)   | 1.64 (1.19 to 2.26), P = 0.002          |                                         |
|                            |                                | CMS labels (n=4)        | 1.44 (1.20 to 1.74), P < 0.001          |                                         |
| CMS4 versus 3<br>RFS local | 1.23 (0.82 to 1.84), P = 0.32  | Sadanandam labels (n=2) | 1.11 (0.71 to 1.75), P = 0.64           | 0.94                                    |
|                            |                                | CMS labels (n=3)        | 1.18 (0.33 to 4.24), P = 0.80           |                                         |

<sup>a</sup>Among single group classifications, only Roepman, Budinska and Sadanandam labels were used as surrogates for the CMSs.

Supplementary Table 12. Sensitivity analyses of single group versus consensus transcriptomic profiling in the prognostic meta-analyses<sup>a</sup>.

| Meta-analyses | Original values<br>HR (95% CI) | Adjusted values sensitivity analyses<br>HR (95% CI) | Excluded classification<br>Reference |
|---------------|--------------------------------|-----------------------------------------------------|--------------------------------------|
| CMS4 versus 1 |                                |                                                     |                                      |
| OS local      | 3.28 (1.27 to 8.47), P = 0.01  | 2.79 (0.95 to 8.20), P = 0.003                      | Roepman et al., 2014 (10)            |
| CMS2 versus 1 |                                |                                                     |                                      |
| OS local      | 0.92 (0.70 to 1.21), P = 0.54  | 0.98 (0.73 to 1.32), P = 0.88                       | Budinska et al., 2013 (2)            |
| CMS2 versus 1 |                                |                                                     |                                      |
| RFS local     | 0.97 (0.82 to 1.15), P = 0.74  | 0.96 (0.80 to 1.15), P = 0.68                       | Budinska et al., 2013 (2)            |
| CMS3 versus 2 |                                |                                                     |                                      |
| RFS local     | 0.96 (0.77 to 1.21), P = 0.74  | 0.97 (0.76 to 1.24), P = 0.81                       | Budinska et al., 2013 (2)            |
| CMS4 versus 2 |                                |                                                     |                                      |
| OS local      | 2.60 (1.93 to 3.50), P < 0.001 | 3.33 (2.00 to 5.00), P < 0.001                      | Budinska et al., 2013 (2)            |
| CMS4 versus 2 |                                |                                                     |                                      |
| SAR local     | 1.97 (1.41 to 2.74), P < 0.001 | 2.00 (1.25 to 3.33), P = 0.009                      | Budinska et al., 2013 (2)            |

<sup>a</sup>Among single group classifications, only Roepman, Budinska and Sadanandam labels were used as surrogates for the CMSs.



Supplementary Table 13. Subgroup analyses for differences between RNA-based CMS classification methods for the meta-analyses into pairwise CMS comparison.

| Meta-analyses                      | Original values<br>HR (95% CI) | Subgroups<br>Method (number of cohorts n) | Values subgroup analyses<br>HR (95% CI) | Difference between subgroups<br>P value |
|------------------------------------|--------------------------------|-------------------------------------------|-----------------------------------------|-----------------------------------------|
| CMS4 versus CMS1<br>OS metastatic  | 0.45 (0.32 to 0.62), P < 0.001 | NanoString-based labels (n=3)             | 0.42 (0.29 to 0.60), P < 0.001          | 0.69                                    |
|                                    |                                | CMS R package labels (n=4)                | 0.48 (0.26 to 0.88), P = 0.02           |                                         |
| CMS4 versus CMS1<br>PFS metastatic | 0.53 (0.38 to 0.75), P < 0.001 | NanoString-based labels (n=3)             | 0.53 (0.38 to 0.72), P < 0.001          | 0.86                                    |
|                                    |                                | CMS R package labels (n=4)                | 0.49 (0.21 to 1.11), P = 0.09           |                                         |
| CMS2 versus CMS1<br>OS metastatic  | 0.33 (0.23 to 0.48), P < 0.001 | NanoString-based labels (n=3)             | 0.29 (0.12 to 0.74), P = 0.01           | 0.90                                    |
|                                    |                                | CMS R package labels (n=4)                | 0.34 (0.23 to 0.51), P < 0.001          |                                         |
|                                    |                                | CMS elastic net labels (n=1)              | 0.39 (0.18 to 0.86), P = 0.02           |                                         |
| CMS2 versus CMS1<br>PFS metastatic | 0.53 (0.35 to 0.81), P = 0.003 | NanoString-based labels (n=3)             | 0.35 (0.14 to 0.88), P = 0.03           | 0.18                                    |
|                                    |                                | CMS R package labels (n=4)                | 0.71 (0.45 to 1.10), P = 0.12           |                                         |
| CMS4 versus CMS2<br>OS metastatic  | 1.41 (1.07 to 1.86), P = 0.02  | NanoString-based labels (n=2)             | 1.53 (0.97 to 2.39), P = 0.07           | 0.84                                    |
|                                    |                                | CMS R package labels (n=4)                | 1.43 (0.91 to 2.23), P = 0.12           |                                         |
| CMS4 versus CMS2<br>PFS metastatic | 0.96 (0.72 to 1.29), P = 0.80  | NanoString-based labels (n=2)             | 1.25 (0.86 to 1.82), P = 0.25           | 0.11                                    |
|                                    |                                | CMS R package labels (n=3)                | 0.82 (0.58 to 1.16), P = 0.26           |                                         |

Abbreviations: CMS, consensus molecular subtype; HR, hazard ratio; OS, overall survival; PFS, progression-free survival

Supplementary Table 14. Subgroup analyses for differences between RNA-based CMS classification methods for meta-analyses into mOS times per CMS.

| Meta-analyses  | Original values<br>Months (95% CI) | Subgroups<br>Method (number of cohorts n) | Values subgroup analyses<br>HR (95% CI) | Difference between subgroups<br>P value |
|----------------|------------------------------------|-------------------------------------------|-----------------------------------------|-----------------------------------------|
| CMS1           | 11.20 (7.69 to 14.71)              | NanoString-based labels (n=4)             | 10.51 (4.81 to 16.20)                   | 0.71                                    |
| mOS metastatic |                                    | CMS R package labels (n=5)                | 11.91 (6.99 to 16.83)                   |                                         |
| CMS1           | 36.39 (30.44 to 42.33)             | NanoString-based labels (n=4)             | 41.14 (38.09 to 44.19)                  | 0.01                                    |
| mOS metastatic |                                    | CMS R package labels (n=5)                | 31.20 (24.15 to 38.26)                  |                                         |
| CMS1           | 21.89 (15.92 to 27.85)             | NanoString-based labels (n=2)             | 23.70 (18.27 to 29.13)                  | 0.66                                    |
| mOS metastatic |                                    | CMS R package labels (n=5)                | 21.44 (13.03 to 29.85)                  |                                         |
| CMS1           | 26.79 (21.07 to 32.50)             | NanoString-based labels (n=5)             | 27.18 (19.09 to 35.28)                  | 0.91                                    |
| mOS metastatic |                                    | CMS R package labels (n=5)                | 26.47 (17.34 to 35.61)                  |                                         |

Abbreviations: CMS, consensus molecular subtype; HR, hazard ratio; mOS, medium overall survival

Supplementary Table 15. Sensitivity analyses for differences between RNA-based CMS classification methods when subgroup analyses were not feasible.

| Meta-analyses                      | Original values<br>HR (95% CI) | Adjusted values sensitivity analyses<br>HR (95% CI) | Excluded study<br>Reference (classifier)           |
|------------------------------------|--------------------------------|-----------------------------------------------------|----------------------------------------------------|
| CMS4 versus CMS1<br>OS local       | 3.28 (1.27 to 8.47), P = 0.01  | 3.27 (0.84 to 12.69), P = 0.09                      | Piskol et al., 2019 (9) (NanoString classifier)    |
| CMS4 versus CMS1<br>RFS local      | 1.84 (1.35 to 2.51), P < 0.001 | 1.96 (1.34 to 2.85), P < 0.001                      | Piskol et al., 2019 (9) (NanoString classifier)    |
| CMS3 versus CMS1<br>OS metastatic  | 0.55 (0.32 to 0.93), P = 0.03  | 0.45 (0.32 to 0.62), P < 0.001                      | Lenz et al., 2019 (19) (NanoString classifier)     |
| CMS3 versus CMS1<br>PFS metastatic | 0.89 (0.60 to 1.34), P = 0.59  | 0.75 (0.51 to 1.09), P = 0.14                       | Lenz et al., 2019 (19) (NanoString classifier)     |
| CMS2 versus CMS1<br>OS local       | 0.92 (0.70 to 1.21), P = 0.54  | 0.89 (0.66 to 1.19), P = 0.43                       | Piskol et al., 2019 (9) (NanoString classifier)    |
| CMS2 versus CMS1<br>OS metastatic  | 0.33 (0.23 to 0.48), P < 0.001 | 0.32 (0.22 to 0.48), P < 0.001                      | Lee et al., 2020 (33) (CMS elastic net classifier) |
| CMS2 versus CMS1<br>RFS local      | 0.97 (0.82 to 1.15), P = 0.74  | 0.98 (0.82 to 1.18), P = 0.85                       | Piskol et al., 2019 (9) (NanoString classifier)    |
| CMS4 versus CMS2<br>OS local       | 2.60 (1.93 to 3.50), P < 0.001 | 2.17 (1.47 to 3.21), P < 0.001                      | Piskol et al., 2019 (9) (NanoString classifier)    |
| CMS4 versus CMS2<br>RFS local      | 1.46 (1.29 to 1.64), P < 0.001 | 1.46 (1.29 to 1.67), P < 0.001                      | Piskol et al., 2019 (9) (NanoString classifier)    |
| CMS4 versus CMS2<br>SAR local      | 1.97 (1.41 to 2.74), P < 0.001 | 1.95 (1.27 to 3.00), P = 0.002                      | Piskol et al., 2019 (9) (NanoString classifier)    |

Abbreviations: CMS, consensus molecular subtype; HR, hazard ratio; OS, overall survival; PFS, progression-free survival; RFS, relapse-free survival; SAR, survival after relapse

Supplementary Figure 1. Forest plots of pooled and single hazard ratios (HRs) for different survival outcomes per consensus molecular subtype (CMS) comparison in colorectal cancer. (A) CMS3 versus CMS1, (B) CMS3 versus CMS2 and (C) CMS4 versus CMS3. Number of cohorts (n) and total number of included patients (N) per meta-analysis indicated with n/N, with overall adjP for the random-effect model. As several studies described more cohorts, the number of cohorts n does not reflect the number of studies. Heterogeneity depicted as I<sup>2</sup> index and Cochran's Q-test P value.

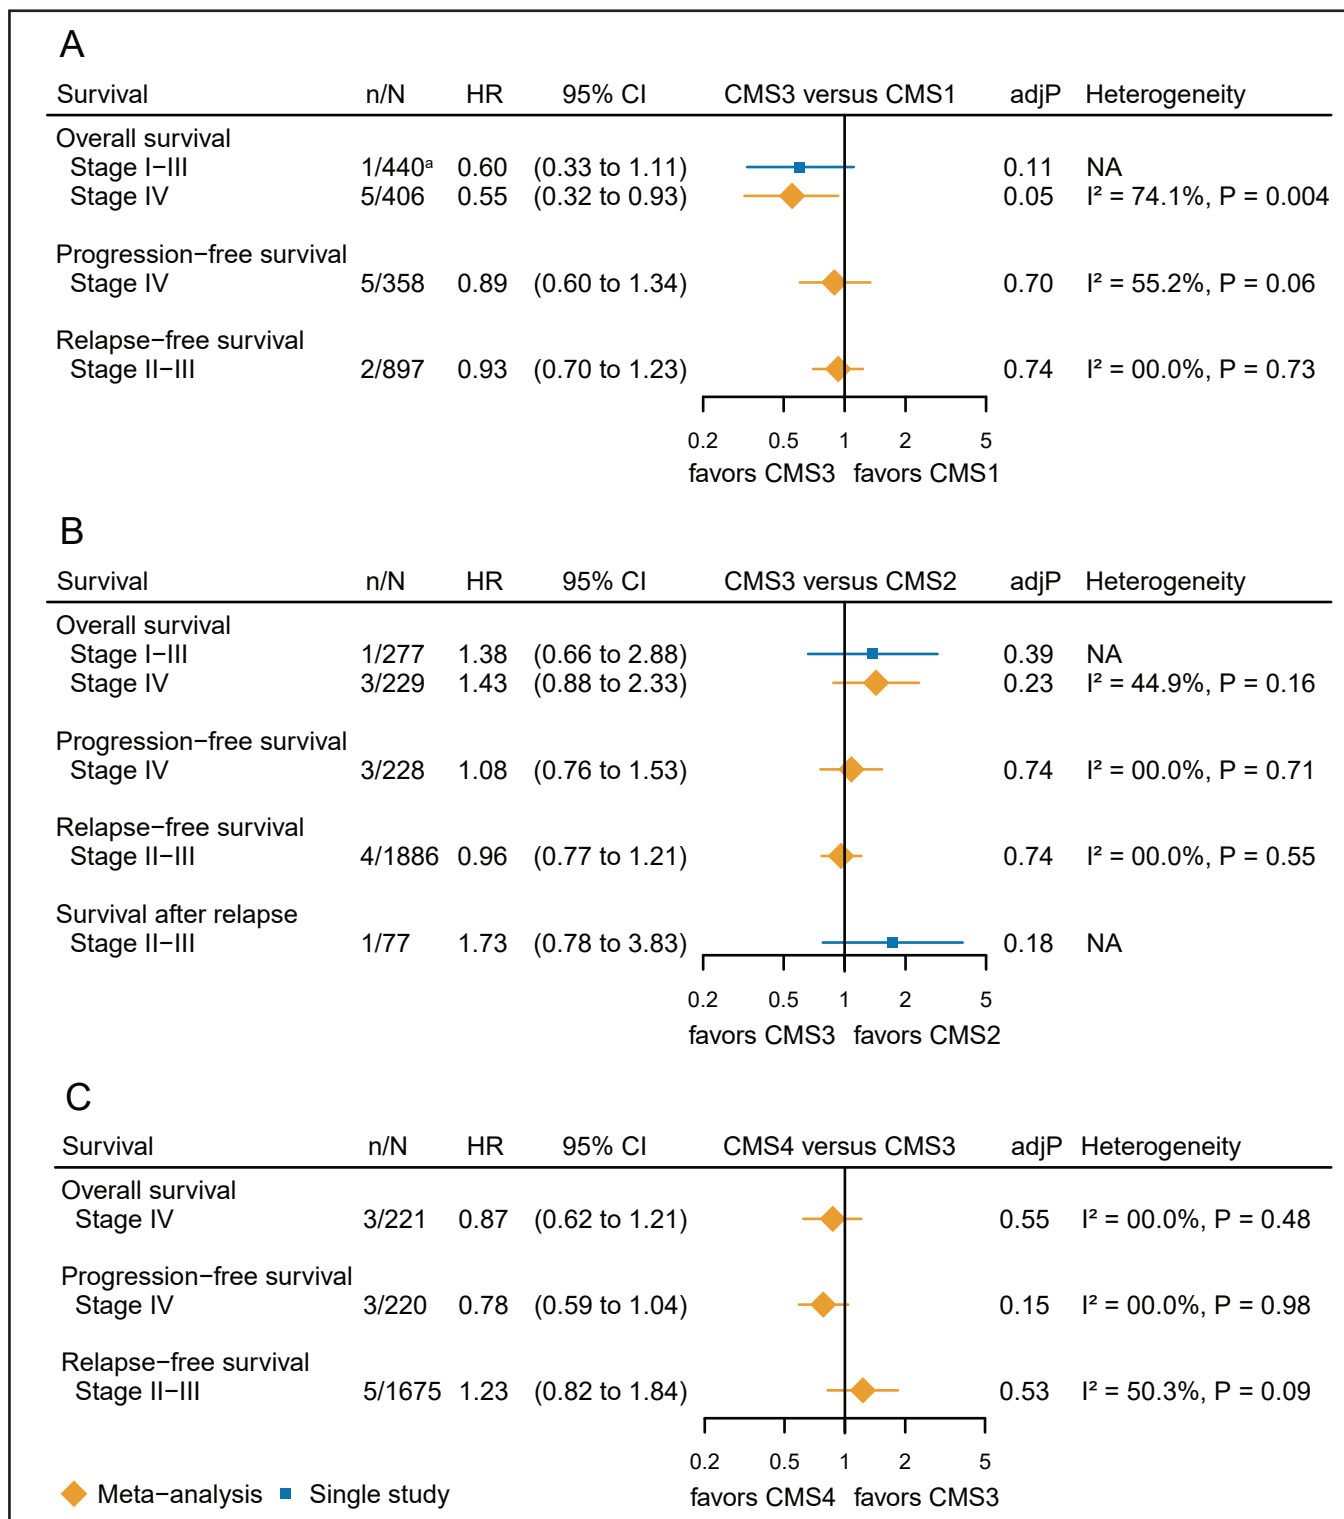

Abbreviations: 95% CI, 95% confidence interval; HR, hazard ratio; adjP, adjusted P value; NA, not applicable.

<sup>a</sup>Estimate

Supplementary Figure 2. Data and weight information for the meta-analyses on the prognostic value of the consensus molecular subtypes. As several studies described more cohorts, the number of cohorts k does not reflect the number of studies. Heterogeneity depicted as I<sup>2</sup> index and Cochran's Q-test.

|                                                                                                |      |                 |      |                                                                                               |         |                                          |        |   |         |       |         |
|------------------------------------------------------------------------------------------------|------|-----------------|------|-----------------------------------------------------------------------------------------------|---------|------------------------------------------|--------|---|---------|-------|---------|
| <b>CMS4 vs CMS1 Overall Survival Stage I-III</b>                                               |      |                 |      | <b>CMS4 vs CMS1 Overall Survival Stage IV</b>                                                 |         |                                          |        |   |         |       |         |
|                                                                                                | HR   | 95%-CI          | %W   |                                                                                               | HR      | 95%-CI                                   | %W     |   |         |       |         |
| Roepman et al., 2014                                                                           | 5.71 | (1.82 to 17.90) | 22.4 | Lenz et al., 2019                                                                             | 0.73    | (0.54 to 0.99)                           | 24.3   |   |         |       |         |
| Piskol et al., 2019                                                                            | 3.85 | (2.02 to 7.33)  | 28.7 | Mooi et al., 2018                                                                             | 0.59    | (0.35 to 0.99)                           | 17.6   |   |         |       |         |
| Jary et al., 2020                                                                              | 1.18 | (0.82 to 1.71)  | 31.5 | Piskol et al., 2019 DARECK                                                                    | 0.33    | (0.15 to 0.72)                           | 11.2   |   |         |       |         |
| Li et al., 2020                                                                                | 7.86 | (1.63 to 37.90) | 17.3 | Piskol et al., 2019 PROCURED                                                                  | 0.34    | (0.14 to 0.82)                           | 9.5    |   |         |       |         |
|                                                                                                |      |                 |      | Okita et al., 2018 chemotherapy group                                                         | 0.42    | (0.23 to 0.77)                           | 15.1   |   |         |       |         |
|                                                                                                |      |                 |      | Okita et al., 2018 anti-EGFR                                                                  | 0.22    | (0.09 to 0.56)                           | 8.9    |   |         |       |         |
|                                                                                                |      |                 |      | Del Rio et al., 2017 (biocolon, regp, cosival)                                                | 0.36    | (0.18 to 0.71)                           | 13.4   |   |         |       |         |
| Number of cohorts combined: k = 4                                                              |      |                 |      | Number of cohorts combined: k = 7                                                             |         |                                          |        |   |         |       |         |
|                                                                                                | HR   | 95%-CI          | z    | P value                                                                                       |         | HR                                       | 95%-CI | z | P value |       |         |
| Random effects model 3.28 (1.27 to 8.47)                                                       |      |                 |      | 2.45                                                                                          | 0.01    | Random effects model 0.45 (0.32 to 0.62) |        |   |         | -4.77 | < 0.001 |
| Quantifying heterogeneity:<br>I <sup>2</sup> = 83.0% (56.6% to 93.3%); H = 2.43 (1.52 to 3.88) |      |                 |      | Quantifying heterogeneity:<br>I <sup>2</sup> = 49.7% (0.0% to 78.7%); H = 1.41 (1.00 to 2.17) |         |                                          |        |   |         |       |         |
| Test of heterogeneity:<br>Q d.f. P value<br>17.66 3 < 0.001                                    |      |                 |      | Test of heterogeneity:<br>Q d.f. P value<br>11.92 6 0.06                                      |         |                                          |        |   |         |       |         |
| <b>CMS4 vs CMS1 Progression-Free Survival Stage IV</b>                                         |      |                 |      | <b>CMS4 vs CMS1 Relapse-Free Survival Stage II-III</b>                                        |         |                                          |        |   |         |       |         |
|                                                                                                | HR   | 95%-CI          | %W   |                                                                                               | HR      | 95%-CI                                   | %W     |   |         |       |         |
| Lenz et al., 2019                                                                              | 0.92 | (0.68 to 1.24)  | 22.4 | Song et al., 2016 (Discovery cohort)                                                          | 2.44    | (1.58 to 3.76)                           | 21.7   |   |         |       |         |
| Mooi et al., 2018                                                                              | 0.53 | (0.25 to 1.12)  | 11.9 | Song et al., 2016 (Validation cohort)                                                         | 2.44    | (1.62 to 3.66)                           | 22.8   |   |         |       |         |
| Piskol et al., 2019 DARECK                                                                     | 0.33 | (0.16 to 0.66)  | 12.8 | Dienstmann et al., 2019                                                                       | 1.38    | (1.11 to 1.72)                           | 31.6   |   |         |       |         |
| Piskol et al., 2019 PROCURED                                                                   | 0.31 | (0.13 to 0.74)  | 9.9  | Piskol et al., 2019 (AVANT cohort)                                                            | 1.43    | (0.80 to 2.56)                           | 6.1    |   |         |       |         |
| Okita et al., 2018 chemotherapy group                                                          | 0.59 | (0.35 to 1.00)  | 16.3 | Li et al., 2020                                                                               | 2.05    | (0.77 to 5.46)                           | 7.9    |   |         |       |         |
| Okita et al., 2018 anti-EGFR                                                                   | 0.42 | (0.21 to 0.84)  | 12.9 |                                                                                               |         |                                          |        |   |         |       |         |
| Del Rio et al., 2017 (biocolon, regp, cosival)                                                 | 0.54 | (0.28 to 1.03)  | 13.9 |                                                                                               |         |                                          |        |   |         |       |         |
| Number of cohorts combined: k = 7                                                              |      |                 |      | Number of cohorts combined: k = 5                                                             |         |                                          |        |   |         |       |         |
|                                                                                                | HR   | 95%-CI          | z    | P value                                                                                       |         | HR                                       | 95%-CI | z | P value |       |         |
| Random effects model 0.53 (0.38 to 0.75)                                                       |      |                 |      | -3.62                                                                                         | < 0.001 | Random effects model 1.84 (1.35 to 2.51) |        |   |         | 3.88  | < 0.001 |
| Quantifying heterogeneity:<br>I <sup>2</sup> = 57.1% (0.5% to 81.5%); H = 1.53 (1.00 to 2.32)  |      |                 |      | Quantifying heterogeneity:<br>I <sup>2</sup> = 58.6% (0.0% to 84.6%); H = 1.55 (1.00 to 2.55) |         |                                          |        |   |         |       |         |
| Test of heterogeneity:<br>Q d.f. P value<br>13.98 6 0.03                                       |      |                 |      | Test of heterogeneity:<br>Q d.f. P value<br>9.65 4 0.047                                      |         |                                          |        |   |         |       |         |
| <b>CMS4 vs CMS2 Overall Survival Stage I-III</b>                                               |      |                 |      | <b>CMS4 vs CMS2 Overall Survival Stage IV</b>                                                 |         |                                          |        |   |         |       |         |
|                                                                                                | HR   | 95%-CI          | %W   |                                                                                               | HR      | 95%-CI                                   | %W     |   |         |       |         |
| Budinska et al., 2013 (subgroup)                                                               | 2.16 | (1.36 to 3.43)  | 41.3 | Schlicker et al., 2020                                                                        | 5.20    | (1.65 to 16.35)                          | 5.3    |   |         |       |         |
| Budinska et al., 2013 (subgroup)                                                               | 2.20 | (1.06 to 4.58)  | 16.5 | Piskol et al., 2019 (DARECK)                                                                  | 1.67    | (0.83 to 3.35)                           | 12.5   |   |         |       |         |
| Piskol et al., 2019 (AVANT)                                                                    | 3.33 | (2.11 to 5.27)  | 42.2 | Piskol et al., 2019 (PROCURED)                                                                | 1.43    | (0.79 to 2.58)                           | 16.0   |   |         |       |         |
|                                                                                                |      |                 |      | Okita et al., 2018 (chemotherapy group)                                                       | 1.32    | (1.03 to 1.70)                           | 39.2   |   |         |       |         |
|                                                                                                |      |                 |      | Okita et al., 2018 (anti-EGFR group)                                                          | 1.36    | (0.66 to 2.78)                           | 11.9   |   |         |       |         |
|                                                                                                |      |                 |      | Del Rio et al., 2017 (biocolon, regp, cosival)                                                | 0.94    | (0.51 to 1.73)                           | 15.1   |   |         |       |         |
| Number of cohorts combined: k = 3                                                              |      |                 |      | Number of cohorts combined: k = 6                                                             |         |                                          |        |   |         |       |         |
|                                                                                                | HR   | 95%-CI          | z    | P value                                                                                       |         | HR                                       | 95%-CI | z | P value |       |         |
| Random effects model 2.60 (1.93 to 3.50)                                                       |      |                 |      | 6.30                                                                                          | < 0.001 | Random effects model 1.41 (1.07 to 1.86) |        |   |         | 2.44  | 0.01    |
| Quantifying heterogeneity:<br>I <sup>2</sup> = 0.0% (0.0% to 89.2%); H = 1.00 (1.00 to 3.05)   |      |                 |      | Quantifying heterogeneity:<br>I <sup>2</sup> = 29.3% (0.0% to 71.1%); H = 1.19 (1.00 to 1.86) |         |                                          |        |   |         |       |         |
| Test of heterogeneity:<br>Q d.f. P value<br>1.93 2 0.38                                        |      |                 |      | Test of heterogeneity:<br>Q d.f. P value<br>7.08 5 0.22                                       |         |                                          |        |   |         |       |         |

Supplementary Figure 2 (continued)

**CMS4 vs CMS2 Progression-Free Survival Stage IV**

|                                                | HR   | 95%-CI         | %W   |
|------------------------------------------------|------|----------------|------|
| Piskol et al., 2019 (DARECK)                   | 1.43 | (0.82 to 2.48) | 18.0 |
| Piskol et al., 2019 (PROCURED)                 | 1.11 | (0.66 to 1.86) | 19.5 |
| Okita et al., 2018 (chemotherapy group)        | 0.75 | (0.49 to 1.15) | 24.1 |
| Okita et al., 2018 (anti-EGFR group)           | 1.20 | (0.70 to 2.05) | 18.7 |
| Del Rio et al., 2017 (biocolon, regp, cosival) | 0.64 | (0.38 to 1.07) | 19.5 |

Number of cohorts combined: k = 5

|                      | HR   | 95%-CI         | z     | P value |
|----------------------|------|----------------|-------|---------|
| Random effects model | 0.96 | (0.72 to 1.29) | -0.25 | 0.80    |

Quantifying heterogeneity:

I<sup>2</sup> = 39.3% (0.0% to 77.5%); H = 1.28 (1.00 to 2.11)

Test of heterogeneity:

| Q    | d.f. | P value |
|------|------|---------|
| 6.59 | 4    | 0.16    |

**CMS4 vs CMS2 Survival After Relapse Stage II-III**

|                                  | HR   | 95%-CI         | %W   |
|----------------------------------|------|----------------|------|
| Budinska et al., 2013 (subgroup) | 1.91 | (1.14 to 3.19) | 41.6 |
| Budinska et al., 2013 (subgroup) | 2.05 | (0.93 to 4.50) | 17.7 |
| Piskol et al., 2019 (AVANT)      | 2.00 | (1.19 to 3.36) | 40.7 |

Number of cohorts combined: k = 3

|                      | HR   | 95%-CI         | z    | P value |
|----------------------|------|----------------|------|---------|
| Random effects model | 1.97 | (1.41 to 2.74) | 4.00 | < 0.001 |

Quantifying heterogeneity:

I<sup>2</sup> = 0.0% (0.0% to 0.0%); H = 1.00 (1.00 to 1.00)

Test of heterogeneity:

| Q    | d.f. | P value |
|------|------|---------|
| 0.03 | 2    | 0.99    |

**CMS2 vs CMS1 Overall Survival Stage IV**

|                                                | HR   | 95%-CI         | %W   |
|------------------------------------------------|------|----------------|------|
| Lenz et al., 2019                              | 0.61 | (0.45 to 0.83) | 18.6 |
| Mooi et al., 2018                              | 0.46 | (0.29 to 0.72) | 16.1 |
| Piskol et al., 2019 (DARECK)                   | 0.20 | (0.09 to 0.43) | 0.9  |
| Piskol et al., 2019 (PROCURED)                 | 0.17 | (0.07 to 0.41) | 9.6  |
| Okita et al., 2018 (chemotherapy group)        | 0.32 | (0.17 to 0.61) | 12.9 |
| Okita et al., 2018 (anti-EGFR group)           | 0.16 | (0.07 to 0.38) | 9.6  |
| Del Rio et al., 2017 (biocolon, regp, cosival) | 0.38 | (0.19 to 0.78) | 11.7 |
| Lee et al., 2019                               | 0.39 | (0.18 to 0.86) | 10.6 |

Number of cohorts combined: k = 8

|                      | HR   | 95%-CI         | z     | P value |
|----------------------|------|----------------|-------|---------|
| Random effects model | 0.33 | (0.23 to 0.48) | -5.95 | < 0.001 |

Quantifying heterogeneity:

I<sup>2</sup> = 62.8% (20.1% to 82.7%); H = 1.64 (1.12 to 2.41)

Test of heterogeneity:

| Q     | d.f. | P value |
|-------|------|---------|
| 18.84 | 7    | 0.009   |

**CMS4 vs CMS2 Relapse-Free Survival Stage II-III**

|                                    | HR   | 95%-CI         | %W   |
|------------------------------------|------|----------------|------|
| Song et al., 2016 (Discovery)      | 1.41 | (0.99 to 2.01) | 11.4 |
| Song et al., 2016 (Validation)     | 1.43 | (1.02 to 2.00) | 12.7 |
| Williams et al., 2018              | 0.31 | (0.04 to 2.53) | 0.3  |
| Budinska et al., 2013              | 1.69 | (1.17 to 2.44) | 10.4 |
| Budinska et al., 2013              | 1.51 | (0.79 to 2.86) | 3.5  |
| Dienstmann et al., 2019            | 1.41 | (1.18 to 1.69) | 43.2 |
| Piskol et al., 2019 (AVANT cohort) | 1.43 | (1.06 to 1.94) | 15.3 |
| Shinto et al., 2020                | 2.13 | (1.11 to 4.10) | 3.3  |

Number of cohorts combined: k = 8

|                      | HR   | 95%-CI         | z    | P value |
|----------------------|------|----------------|------|---------|
| Random effects model | 1.46 | (1.29 to 1.64) | 6.21 | < 0.001 |

Quantifying heterogeneity:

I<sup>2</sup> = 0.0% (0.0% to 45.7%); H = 1.00 (1.00 to 1.36)

Test of heterogeneity:

| Q    | d.f. | P value |
|------|------|---------|
| 4.18 | 7    | 0.76    |

**CMS2 vs CMS1 Overall Survival Stage I-III**

|                                    | HR   | 95%-CI         | %W   |
|------------------------------------|------|----------------|------|
| Budinska et al., 2013              | 0.64 | (0.32 to 1.30) | 14.9 |
| Piskol et al., 2019 (AVANT cohort) | 1.11 | (0.56 to 2.21) | 15.8 |
| Jary et al., 2020                  | 0.95 | (0.68 to 1.32) | 69.3 |

Number of cohorts combined: k = 3

|                      | HR   | 95%-CI         | z     | P value |
|----------------------|------|----------------|-------|---------|
| Random effects model | 0.92 | (0.70 to 1.21) | -0.61 | 0.54    |

Quantifying heterogeneity:

I<sup>2</sup> = 0.0% (0.0% to 84.2%); H = 1.00 (1.00 to 2.51)

Test of heterogeneity:

| Q    | d.f. | P value |
|------|------|---------|
| 1.31 | 2    | 0.52    |

**CMS2 vs CMS1 Progression-Free Survival Stage IV**

|                                                | HR   | 95%-CI         | %W   |
|------------------------------------------------|------|----------------|------|
| Lenz et al., 2019                              | 0.73 | (0.55 to 0.97) | 18.5 |
| Mooi et al., 2018                              | 1.03 | (0.54 to 1.95) | 13.7 |
| Piskol et al., 2019 (DARECK)                   | 0.22 | (0.11 to 0.43) | 13.3 |
| Piskol et al., 2019 (PROCURED)                 | 0.23 | (0.10 to 0.51) | 11.6 |
| Okita et al., 2018 (chemotherapy group)        | 0.79 | (0.47 to 1.34) | 15.3 |
| Okita et al., 2018 (anti-EGFR group)           | 0.35 | (0.18 to 0.66) | 13.7 |
| Del Rio et al., 2017 (biocolon, regp, cosival) | 0.85 | (0.46 to 1.58) | 14.0 |

Number of cohorts combined: k = 7

|                      | HR   | 95%-CI         | z     | P value |
|----------------------|------|----------------|-------|---------|
| Random effects model | 0.53 | (0.35 to 0.81) | -2.94 | 0.003   |

Quantifying heterogeneity:

I<sup>2</sup> = 74.7% (46.2% to 88.1%); H = 1.99 (1.36 to 2.90)

Test of heterogeneity:

| Q     | d.f. | P value |
|-------|------|---------|
| 23.73 | 6    | < 0.001 |

Supplementary Figure 2 (continued)

**CMS2 vs CMS1 Relapse-Free Survival Stage II-III**

|                                    | HR   | 95%-CI         | %W   |
|------------------------------------|------|----------------|------|
| Williams et al., 2018              | 0.31 | (0.02 to 4.78) | 0.4  |
| Budinska et al., 2013              | 1.06 | (0.58 to 1.94) | 8.1  |
| Dienstmann et al., 2019            | 0.98 | (0.81 to 1.19) | 76.5 |
| Piskol et al., 2019 (AVANT cohort) | 0.91 | (0.58 to 1.42) | 15.0 |

Number of cohorts combined: k = 4

|                      | HR   | 95%-CI         | z     | P value |
|----------------------|------|----------------|-------|---------|
| Random effects model | 0.97 | (0.82 to 1.15) | -0.34 | 0.74    |

Quantifying heterogeneity:

I<sup>2</sup> = 0.0% (0.0% to 45.4%); H = 1.00 (1.00 to 1.35)

Test of heterogeneity:

| Q    | d.f. | P value |
|------|------|---------|
| 0.84 | 3    | 0.84    |

**CMS3 vs CMS1 Progression-Free Survival Stage IV**

|                                                | HR   | 95%-CI         | %W   |
|------------------------------------------------|------|----------------|------|
| Lenz et al., 2019                              | 1.33 | (0.92 to 1.91) | 28.9 |
| Mooi et al., 2018                              | 1.53 | (0.61 to 3.85) | 12.6 |
| Okita et al., 2018 (chemotherapy group)        | 0.78 | (0.46 to 1.31) | 23.2 |
| Okita et al., 2018 (anti-EGFR group)           | 0.50 | (0.25 to 1.01) | 17.6 |
| Del Rio et al., 2017 (biocolon, regp, cosival) | 0.68 | (0.34 to 1.37) | 17.7 |

Number of cohorts combined: k = 5

|                      | HR   | 95%-CI         | z     | P value |
|----------------------|------|----------------|-------|---------|
| Random effects model | 0.89 | (0.60 to 1.34) | -0.55 | 0.59    |

Quantifying heterogeneity:

I<sup>2</sup> = 55.2% (0.0% to 83.4%); H = 1.49 (1.00 to 2.46)

Test of heterogeneity:

| Q    | d.f. | P value |
|------|------|---------|
| 8.93 | 4    | 0.06    |

**CMS3 vs CMS2 Overall Survival Stage IV**

|                                                | HR   | 95%-CI         | %W   |
|------------------------------------------------|------|----------------|------|
| Okita et al., 2018 (chemotherapy group)        | 1.47 | (0.88 to 2.47) | 40.4 |
| Okita et al., 2018 (anti-EGFR group)           | 2.27 | (1.12 to 4.59) | 29.1 |
| Del Rio et al., 2017 (biocolon, regp, cosival) | 0.88 | (0.45 to 1.73) | 30.5 |

Number of cohorts combined: k = 3

|                      | HR   | 95%-CI         | z    | P value |
|----------------------|------|----------------|------|---------|
| Random effects model | 1.43 | (0.88 to 2.33) | 1.43 | 0.15    |

Quantifying heterogeneity:

I<sup>2</sup> = 44.9% (0.0% to 83.6%); H = 1.35 (1.00 to 2.47)

Test of heterogeneity:

| Q    | d.f. | P value |
|------|------|---------|
| 3.63 | 2    | 0.16    |

**CMS3 vs CMS1 Overall Survival Stage IV**

|                                                | HR   | 95%-CI         | %W   |
|------------------------------------------------|------|----------------|------|
| Lenz et al., 2019                              | 1.19 | (0.81 to 1.75) | 24.3 |
| Mooi et al., 2018                              | 0.55 | (0.31 to 0.97) | 21.1 |
| Okita et al., 2018 (chemotherapy group)        | 0.47 | (0.26 to 0.84) | 20.9 |
| Okita et al., 2018 (anti-EGFR group)           | 0.37 | (0.15 to 0.89) | 15.9 |
| Del Rio et al., 2017 (biocolon, regp, cosival) | 0.33 | (0.16 to 0.70) | 17.8 |

Number of cohorts combined: k = 5

|                      | HR   | 95%-CI         | z     | P value |
|----------------------|------|----------------|-------|---------|
| Random effects model | 0.55 | (0.32 to 0.93) | -2.21 | 0.03    |

Quantifying heterogeneity:

I<sup>2</sup> = 74.1% (35.7% to 89.6%); H = 1.96 (1.25 to 3.10)

Test of heterogeneity:

| Q     | d.f. | P value |
|-------|------|---------|
| 15.44 | 4    | 0.004   |

**CMS3 vs CMS1 Relapse-Free Survival Stage II-III**

|                         | HR   | 95%-CI         | %W   |
|-------------------------|------|----------------|------|
| Williams et al., 2018   | 0.57 | (0.04 to 8.58) | 1.1  |
| Dienstmann et al., 2019 | 0.93 | (0.70 to 1.24) | 98.9 |

Number of cohorts combined: k = 2

|                      | HR   | 95%-CI         | z     | P value |
|----------------------|------|----------------|-------|---------|
| Random effects model | 0.93 | (0.70 to 1.23) | -0.54 | 0.59    |

Quantifying heterogeneity:

I<sup>2</sup> = 0.0%; H = 1.00

Test of heterogeneity:

| Q    | d.f. | P value |
|------|------|---------|
| 0.12 | 1    | 0.72    |

**CMS3 vs CMS2 Progression-Free Survival Stage IV**

|                                                | HR   | 95%-CI         | %W   |
|------------------------------------------------|------|----------------|------|
| Okita et al., 2018 (chemotherapy group)        | 0.99 | (0.54 to 1.81) | 29.9 |
| Okita et al., 2018 (anti-EGFR group)           | 1.46 | (0.86 to 2.47) | 38.1 |
| Del Rio et al., 2017 (biocolon, regp, cosival) | 0.81 | (0.45 to 1.45) | 32.0 |

Number of cohorts combined: k = 3

|                      | HR   | 95%-CI         | z    | P value |
|----------------------|------|----------------|------|---------|
| Random effects model | 1.08 | (0.76 to 1.53) | 0.41 | 0.68    |

Quantifying heterogeneity:

I<sup>2</sup> = 12.3% (0.0% to 90.9%); H = 1.07 (1.00 to 3.31)

Test of heterogeneity:

| Q    | d.f. | P value |
|------|------|---------|
| 2.28 | 2    | 0.32    |

Supplementary Figure 2 (continued)

**CMS3 vs CMS2 Relapse-Free Survival Stage II-III**

|                         | HR   | 95%-CI         | %W   |
|-------------------------|------|----------------|------|
| Williams et al., 2018   | 1.87 | (0.55 to 6.32) | 3.5  |
| Budinska et al., 2013   | 0.91 | (0.48 to 1.71) | 13.0 |
| Dienstmann et al., 2019 | 0.95 | (0.74 to 1.22) | 82.2 |
| Shinto et al., 2020     | 0.61 | (0.08 to 4.65) | 1.3  |

Number of cohorts combined: k = 4

|                      | HR   | 95%-CI         | z     | P value |
|----------------------|------|----------------|-------|---------|
| Random effects model | 0.96 | (0.77 to 1.21) | -0.34 | 0.74    |

Quantifying heterogeneity:  
 $I^2 = 0.0\%$  (0.0% to 66.7%);  $H = 1.00$  (1.00 to 1.73)

Test of heterogeneity:

| Q    | d.f. | P value |
|------|------|---------|
| 1.38 | 3    | 0.71    |

**CMS4 vs CMS3 Progression-Free Survival Stage IV**

|                                                | HR   | 95%-CI         | %W   |
|------------------------------------------------|------|----------------|------|
| Okita et al., 2018 (chemotherapy group)        | 0.76 | (0.52 to 1.12) | 53.6 |
| Okita et al., 2018 (anti-EGFR group)           | 0.82 | (0.44 to 1.52) | 21.4 |
| Del Rio et al., 2017 (biocolon, regp, cosival) | 0.79 | (0.45 to 1.39) | 25.0 |

Number of cohorts combined: k = 3

|                      | HR   | 95%-CI         | z     | P value |
|----------------------|------|----------------|-------|---------|
| Random effects model | 0.78 | (0.58 to 1.04) | -1.71 | 0.09    |

Quantifying heterogeneity:  
 $I^2 = 0.0\%$  (0.0% to 0.0%);  $H = 1.00$  (1.00 to 1.00)

Test of heterogeneity:

| Q    | d.f. | P value |
|------|------|---------|
| 0.04 | 2    | 0.98    |

**CMS4 vs CMS3 Overall Survival Stage IV**

|                                                | HR   | 95%-CI         | %W   |
|------------------------------------------------|------|----------------|------|
| Okita et al., 2018 (chemotherapy group)        | 0.90 | (0.57 to 1.43) | 51.2 |
| Okita et al., 2018 (anti-EGFR group)           | 0.60 | (0.29 to 1.24) | 20.7 |
| Del Rio et al., 2017 (biocolon, regp, cosival) | 1.08 | (0.58 to 2.02) | 28.1 |

Number of cohorts combined: k = 3

|                      | HR   | 95%-CI         | z     | P value |
|----------------------|------|----------------|-------|---------|
| Random effects model | 0.87 | (0.62 to 1.21) | -0.82 | 0.41    |

Quantifying heterogeneity:  
 $I^2 = 0.0\%$  (0.0% to 85.9%);  $H = 1.00$  (1.00 to 2.66)

Test of heterogeneity:

| Q    | d.f. | P value |
|------|------|---------|
| 1.47 | 2    | 0.48    |

**CMS4 vs CMS3 Relapse-Free Survival Stage II-III**

|                                | HR   | 95%-CI          | %W   |
|--------------------------------|------|-----------------|------|
| Williams et al., 2018          | 0.16 | (0.02 to 1.46)  | 3.1  |
| Song et al., 2016 (Discovery)  | 1.45 | (0.85 to 2.49)  | 25.7 |
| Song et al., 2016 (Validation) | 0.91 | (0.59 to 1.40)  | 31.0 |
| Dienstmann et al., 2019        | 1.48 | (1.06 to 2.06)  | 36.0 |
| Shinto et al., 2020            | 3.72 | (0.58 to 23.79) | 4.3  |

Number of cohorts combined: k = 5

|                      | HR   | 95%-CI         | z    | P value |
|----------------------|------|----------------|------|---------|
| Random effects model | 1.23 | (0.82 to 1.84) | 1.00 | 0.32    |

Quantifying heterogeneity:  
 $I^2 = 50.3\%$  (0.0% to 81.8%);  $H = 1.42$  (1.00 to 2.34)

Test of heterogeneity:

| Q    | d.f. | P value |
|------|------|---------|
| 8.05 | 4    | 0.09    |



Supplementary Figure 3. Forest plots of hazard ratios (HRs) for the predictive value of the consensus molecular subtypes (CMSs) for first-line systemic therapy in metastatic colorectal cancer. (A) Overall survival for an irinotecan backbone versus control. (B) Progression-free survival for the addition of bevacizumab versus control. (C) Progression-free survival for the addition of bevacizumab versus cetuximab.

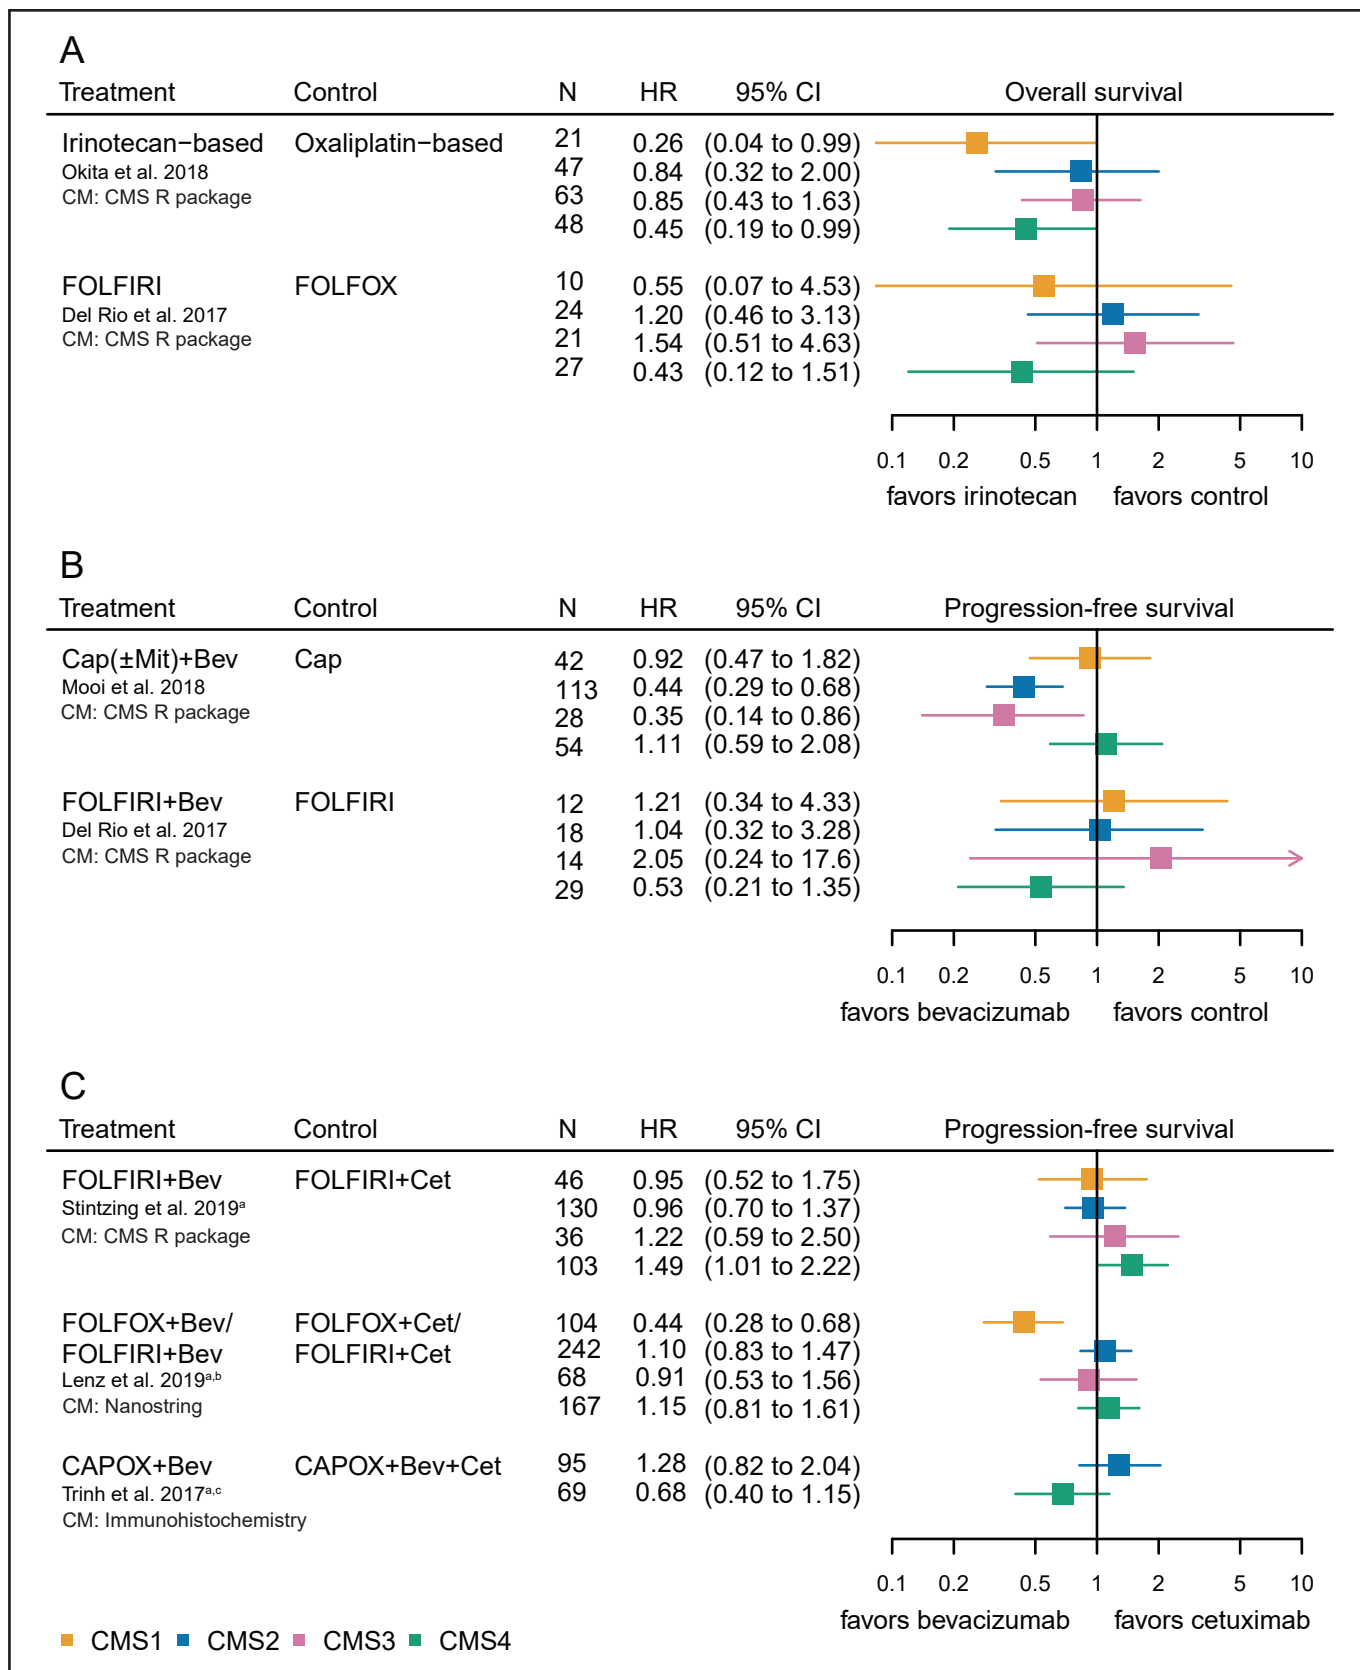

Abbreviations: Bev, bevacizumab; Cap, capecitabine; CAPOX, capecitabine and oxaliplatin; Cet, cetuximab; CM, classification method; FOLFIRI, 5-fluorouracil, leucovorin, and irinotecan; FOLFOX, 5-fluorouracil, leucovorin, and oxaliplatin; FOLFOXIRI, 5-fluorouracil, leucovorin, oxaliplatin and irinotecan; IRI, irinotecan; Mit, mitomycin; N, number of patients.

<sup>a</sup>KRAS wildtype population

<sup>b</sup>75.2% FOLFOX / 24.8% FOLFIRI

<sup>c</sup>Immunohistochemistry classification CMS2/3 depicted as CMS2

Supplementary Figure 4. Pearson residuals from the chi-square analysis into the distribution of the consensus molecular subtype (CMS) labels per individual study, stratified by stage.

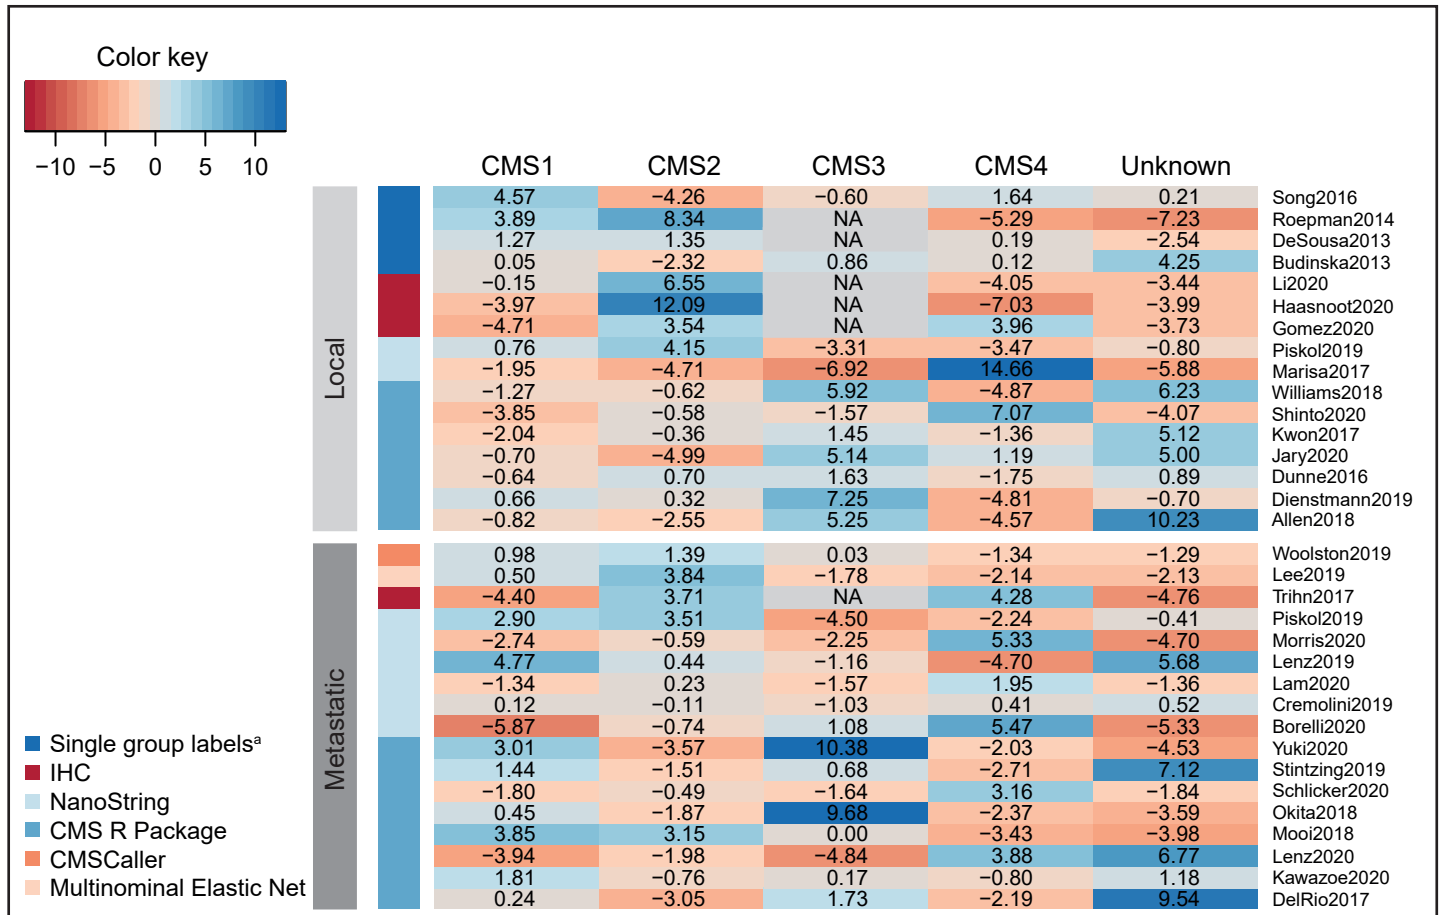

Abbreviations: IHC, immunohistochemistry; NA, no CMS3 labels available within the classification method used.

<sup>a</sup>Single group transcriptomic labels (Budinska, De Sousa, Roepman and Sadanandam).

Supplementary Figure 5. Funnel plots, including Egger's test p-values, for CMS4 versus CMS1 OS local (A), OS metastatic (B), PFS metastatic (C), RFS local (D); CMS4 versus CMS2 OS local (E), OS metastatic (F), PFS metastatic (G), RFS local (H), SAR local (I). Dashed vertical line indicates pooled effect size of each meta-analysis.

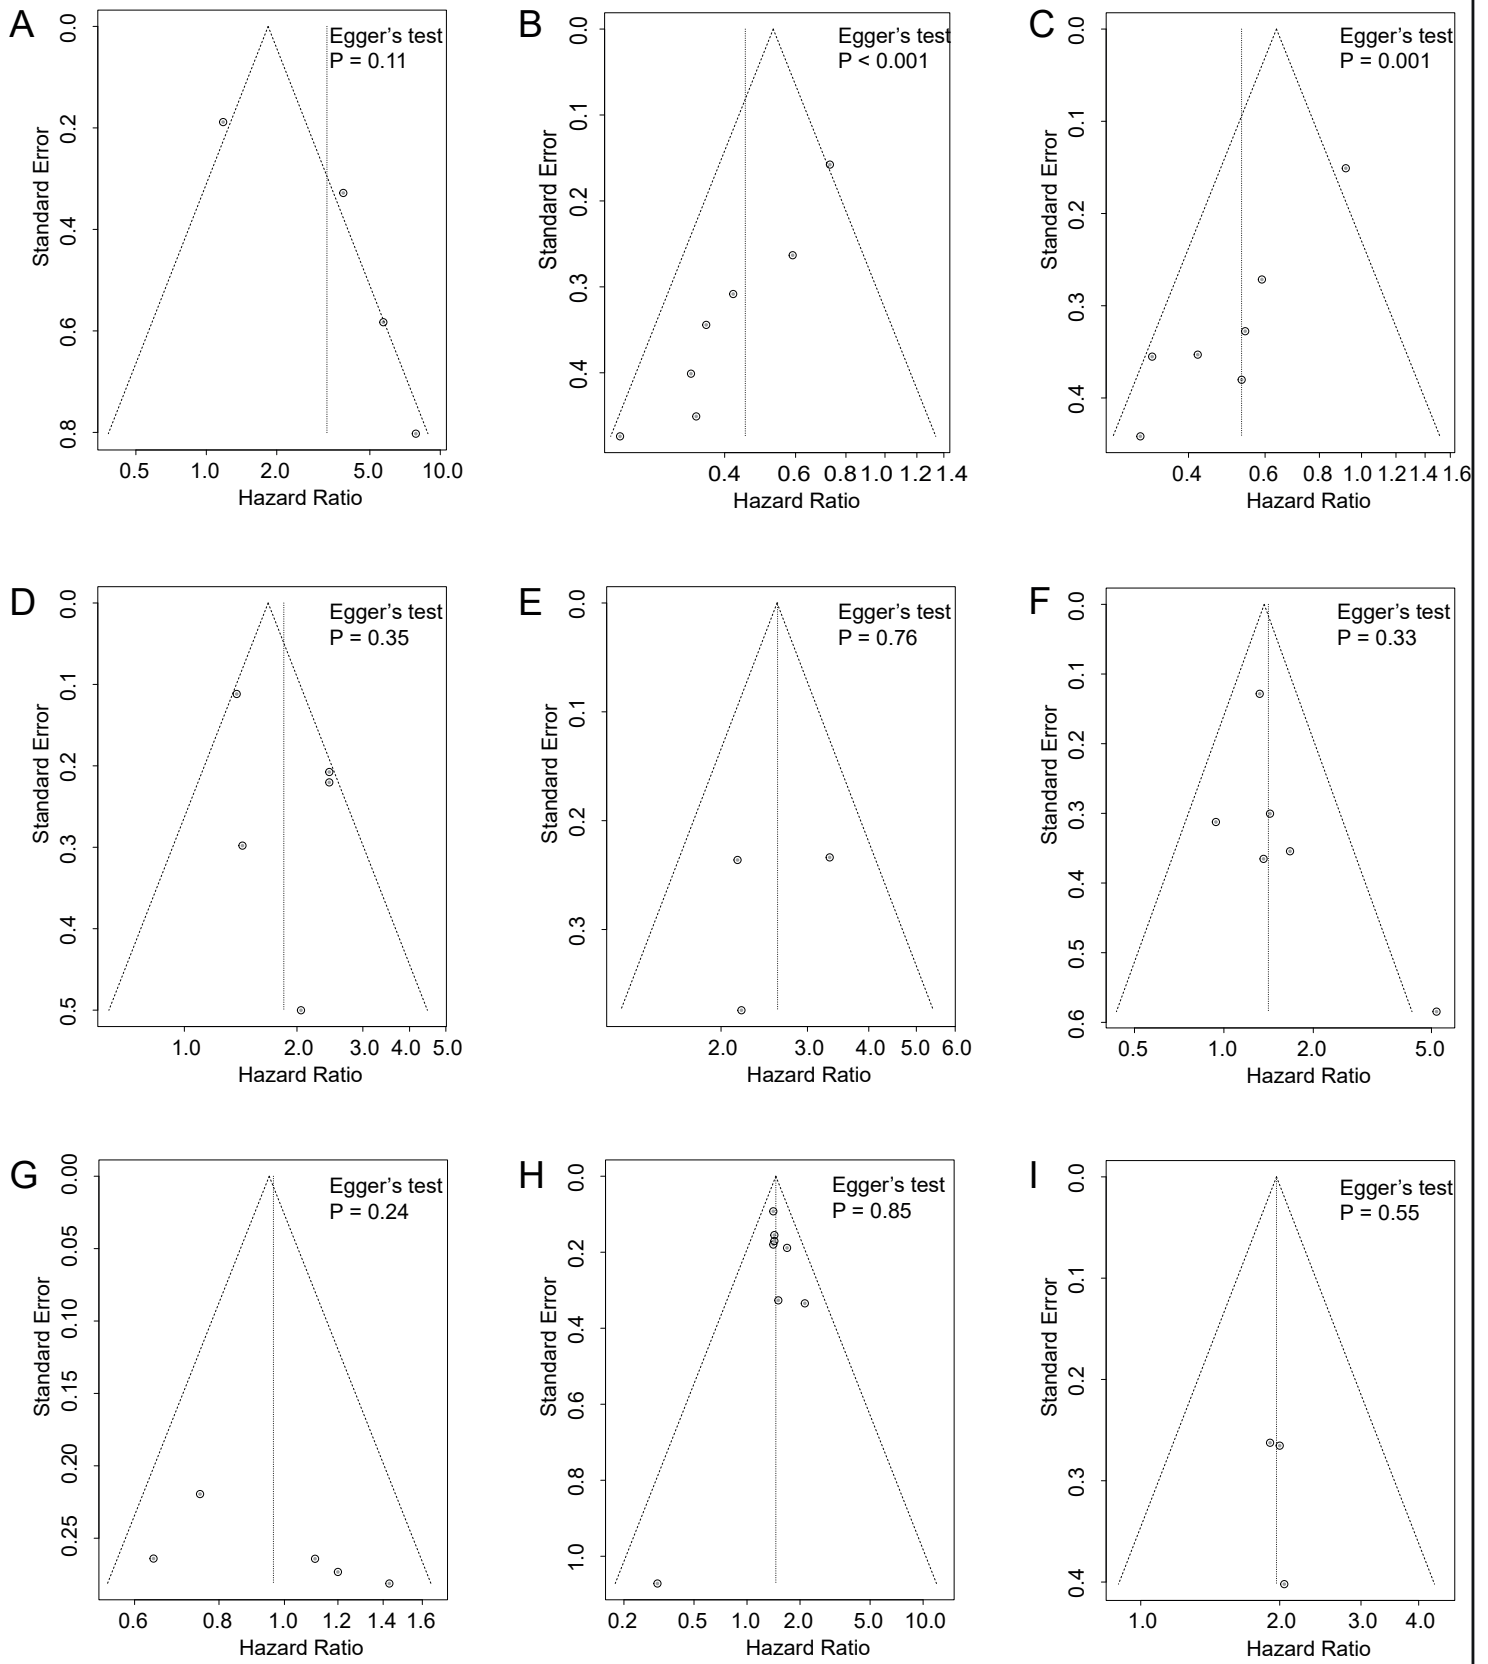

Supplementary Figure 6. Funnel plots, including Egger's test p-values, for CMS2 versus CMS1 OS local (A), OS metastatic (B), PFS metastatic (C), RFS local (D); CMS3 versus CMS1 OS metastatic (E), PFS metastatic (F), RFS local (G); CMS3 versus CMS2 OS metastatic (H), PFS metastatic (I). Dashed vertical line indicates pooled effect size of each meta-analysis.

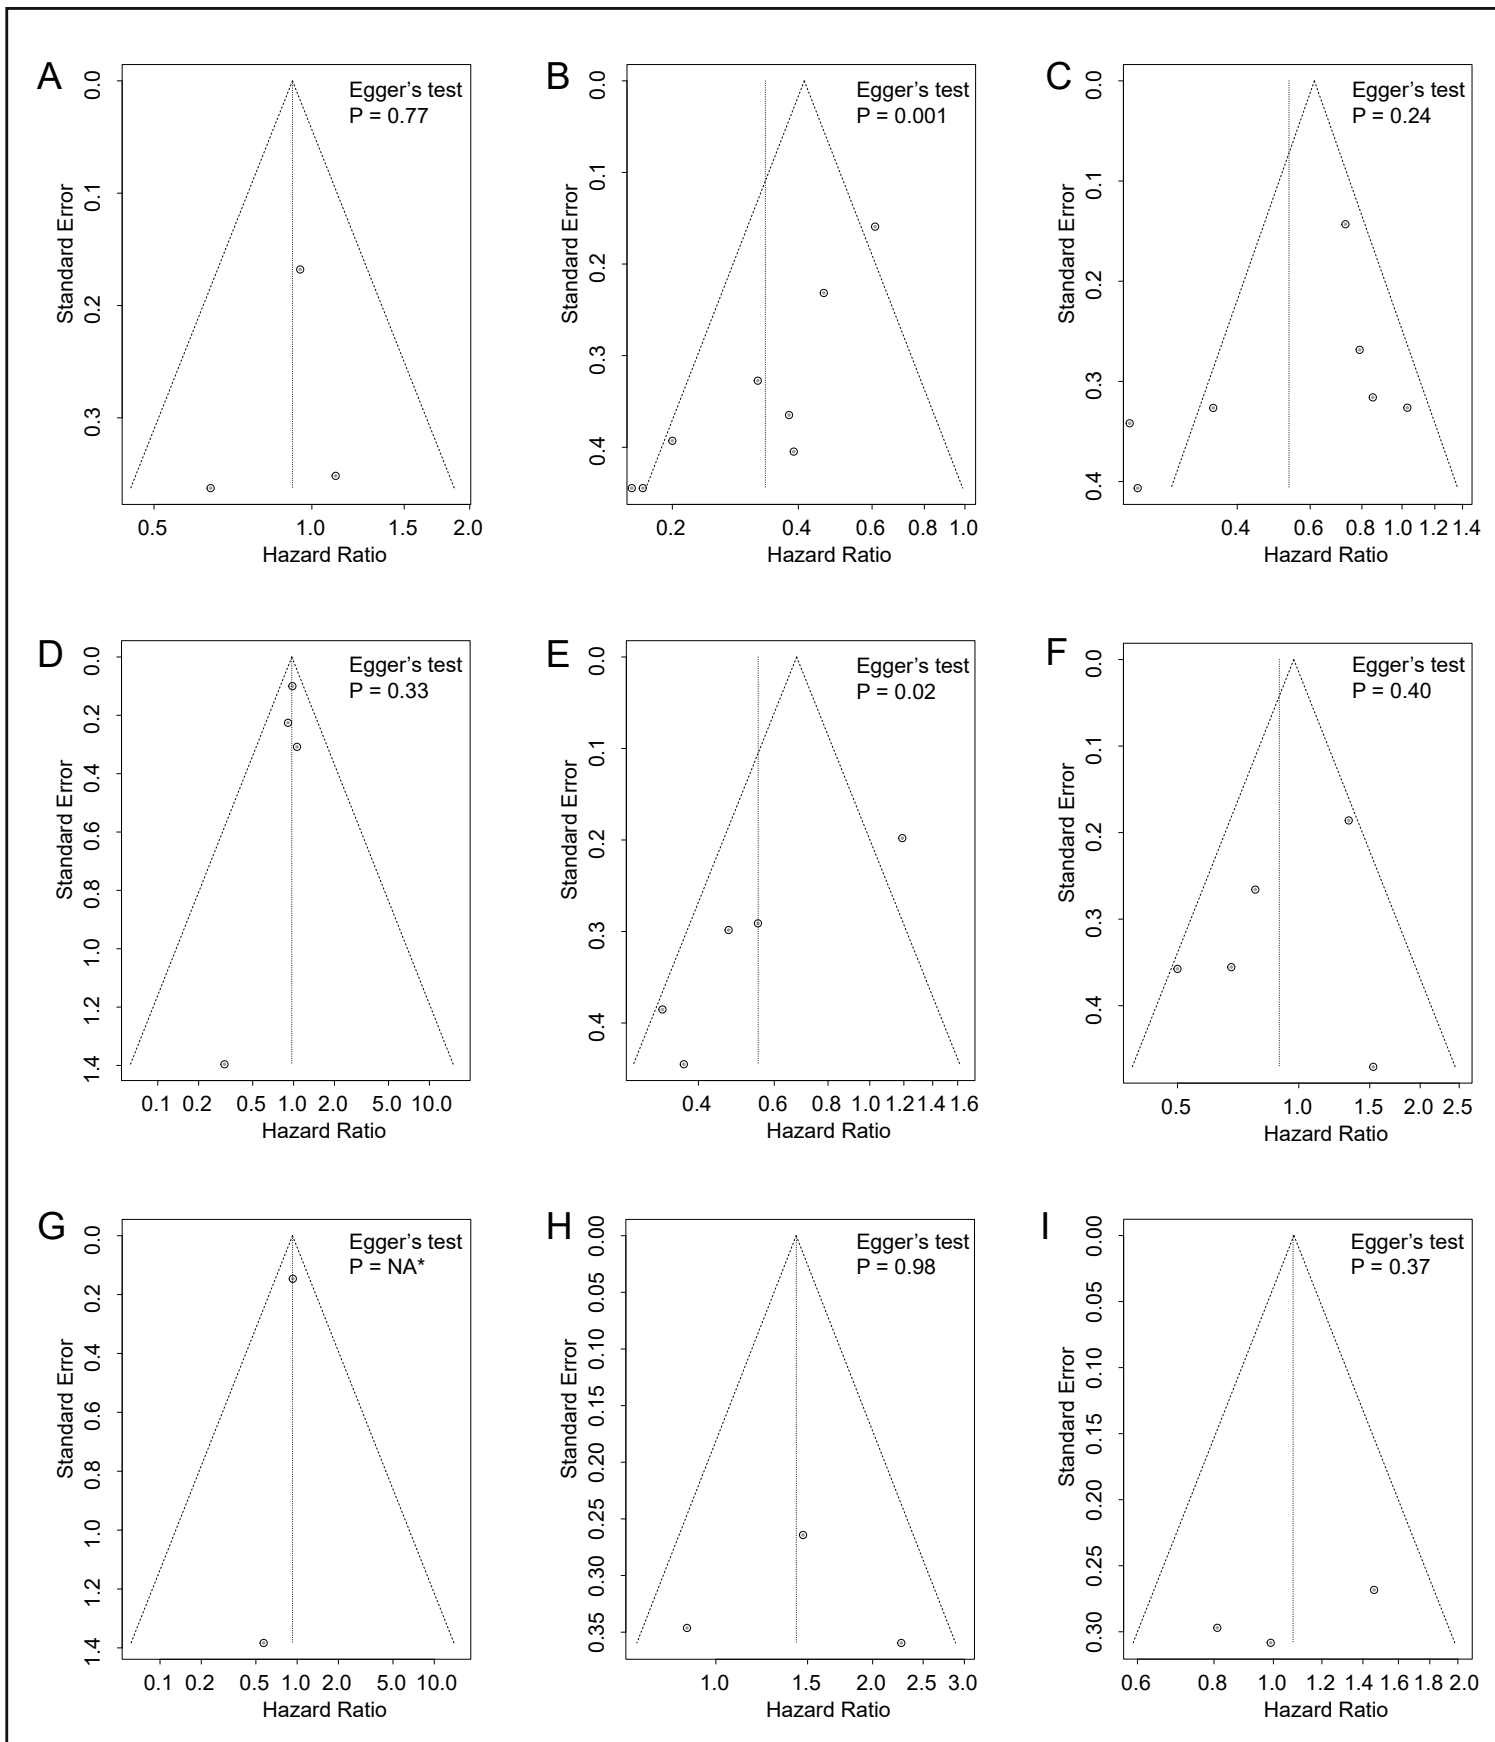

Abbreviations: NA, not available.

\*Egger's test P value not available since only two studies included.

Supplementary Figure 7. Funnel plots, including Egger's test p-values, for CMS3 versus CMS2 RFS local (A); CMS4 versus CMS3 OS metastatic (B), PFS metastatic (C), RFS local (D); CMS1 mOS metastatic (E), CMS2 mOS metastatic (F), CMS3 mOS metastatic (G), CMS4 mOS metastatic (H). Dashed vertical line indicates pooled effect size of each meta-analysis.

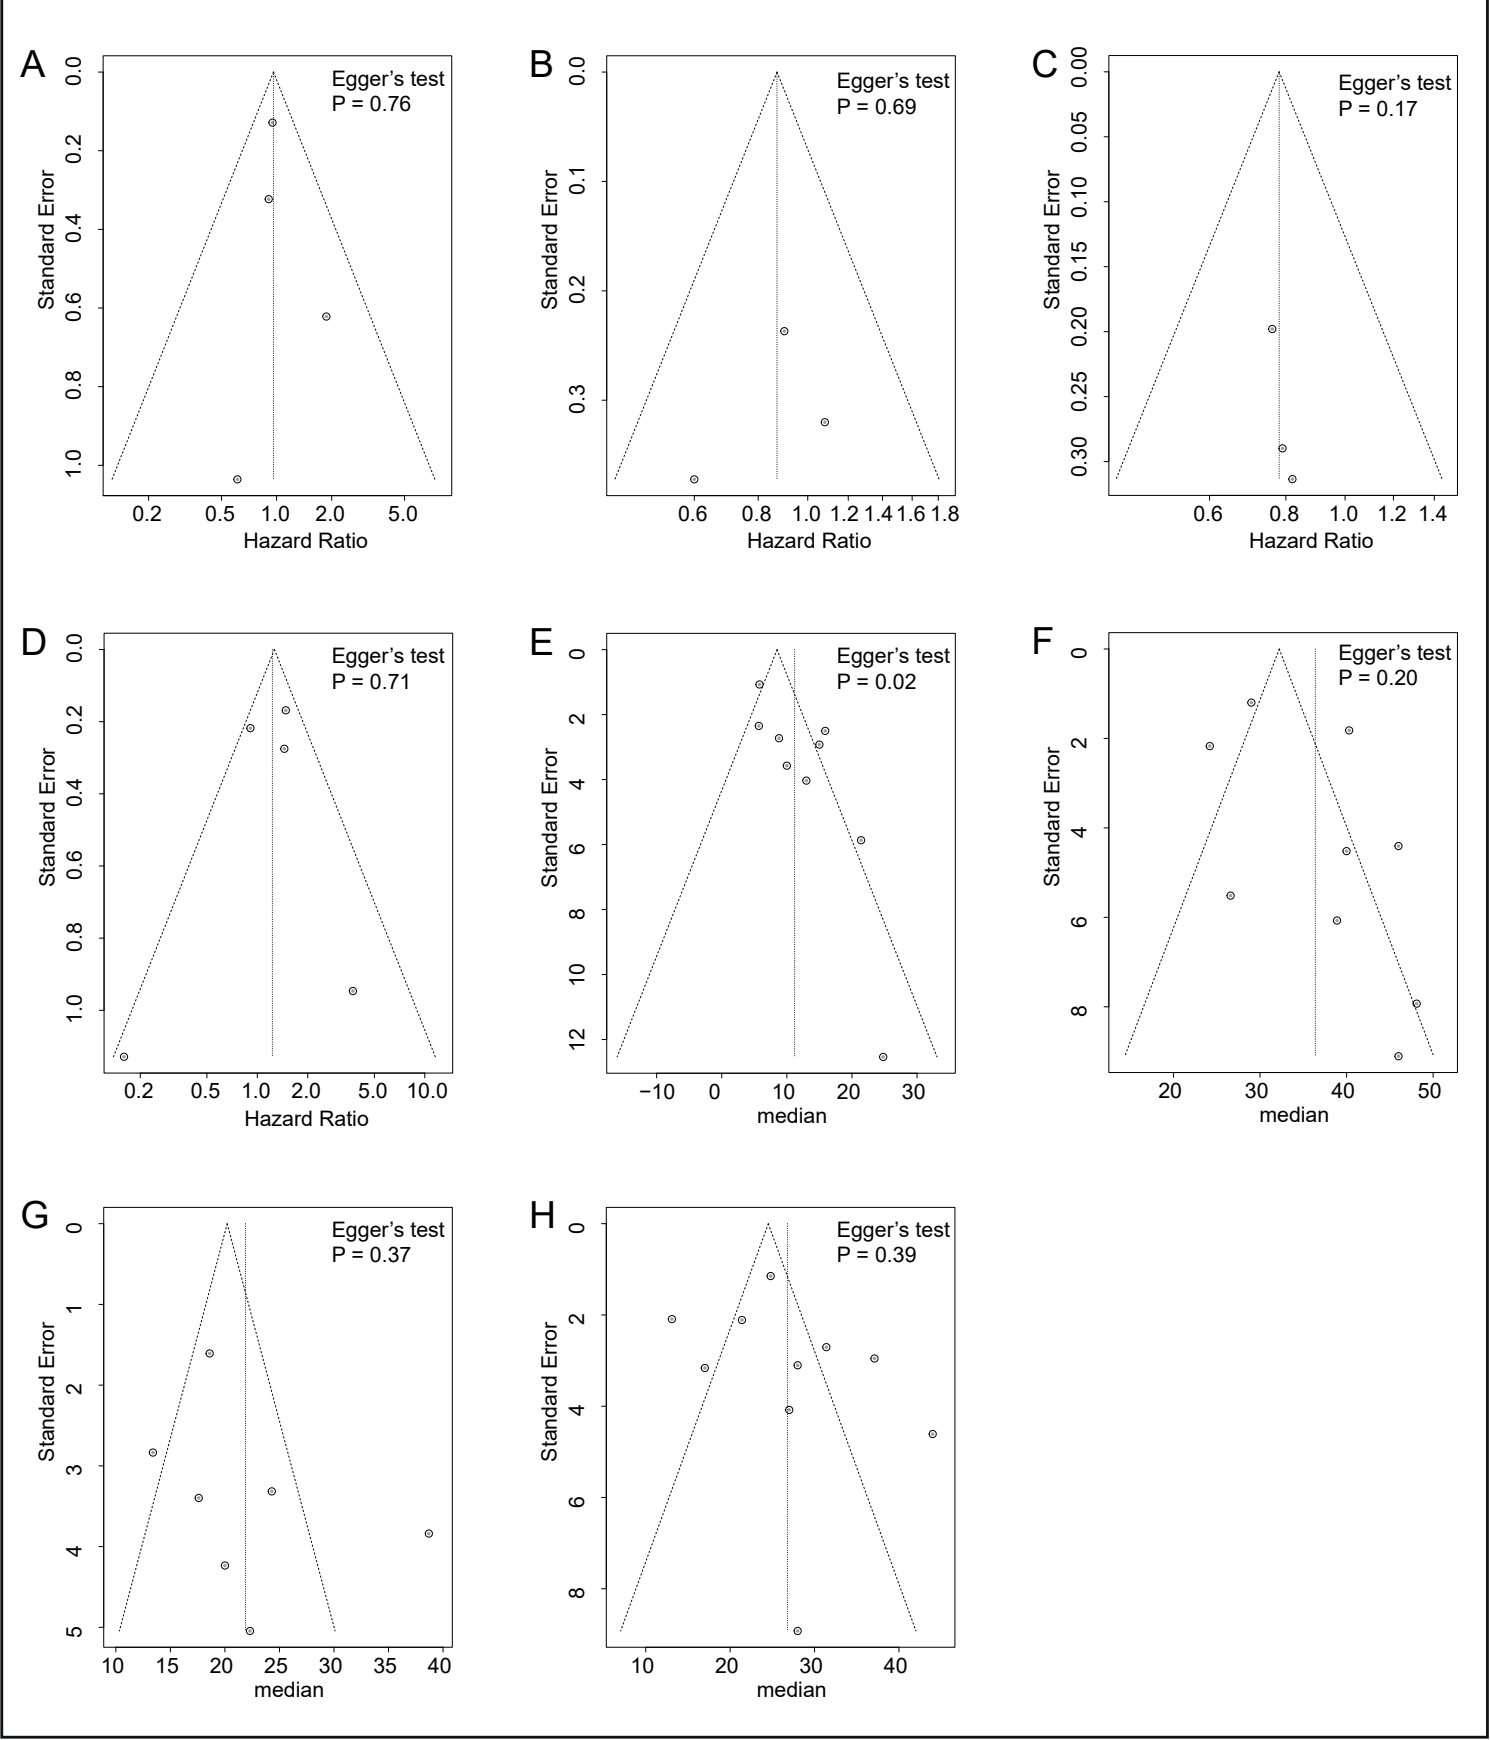

## References

1. Allen WL, Dunne PD, McDade S, Scanlon E, Loughrey M, Coleman H, *et al.* Transcriptional subtyping and CD8 immunohistochemistry identifies poor prognosis stage II/III colorectal cancer patients who benefit from adjuvant chemotherapy. *JCO Precis Oncol* **2018**;13:13.
2. Budinska E, Popovici V, Tejpar S, D'Ario G, Lapique N, Sikora KO, *et al.* Gene expression patterns unveil a new level of molecular heterogeneity in colorectal cancer. *J Pathol* **2013**;231(1):63-76.
3. Dienstmann R, Villacampa G, Svein A, Mason MJ, Niedzwiecki D, Nesbakken A, *et al.* Relative contribution of clinicopathological variables, genomic markers, transcriptomic subtyping and microenvironment features for outcome prediction in stage II/III colorectal cancer. *Annals of oncology : official journal of the European Society for Medical Oncology* **2019**;30(10):1622-9.
4. Dunne PD, O'Reilly PG, Coleman HG, Gray RT, Longley DB, Johnston PG, *et al.* Stratified analysis reveals chemokine-like factor (CKLF) as a potential prognostic marker in the MSI-immune consensus molecular subtype CMS1 of colorectal cancer. *Oncotarget* **2016**;7(24):36632-44.
5. Haasnoot KJC, Backes Y, Moons LMG, Kranenburg O, Trinh A, Vermeulen L, *et al.* Associations of non-pedunculated T1 colorectal adenocarcinoma outcome with consensus molecular subtypes, immunoscore, and microsatellite status: a multicenter case-cohort study. *Mod Pathol* **2020** doi 10.1038/s41379-020-0598-9.
6. Jary M, Hasanova R, Vienot A, Asgarov K, Loyon R, Tirele C, *et al.* Molecular description of ANGPT2 associated colorectal carcinoma. *Int J Cancer* **2020**;29:29.
7. Kwon Y, Park M, Jang M, Yun S, Kim WK, Kim S, *et al.* Prognosis of stage III colorectal carcinomas with FOLFOX adjuvant chemotherapy can be predicted by molecular subtype. *Oncotarget* **2017**;8(24):39367-81.
8. Li Y, Yao Q, Zhang L, Mo S, Cai S, Huang D, *et al.* Immunohistochemistry-Based Consensus Molecular Subtypes as a Prognostic and Predictive Biomarker for Adjuvant Chemotherapy in Patients with Stage II Colorectal Cancer. *Oncologist* **2020**;14:14.
9. Piskol R, Huw L, Sergin I, Kljin C, Modrusan Z, Kim D, *et al.* A Clinically Applicable Gene-Expression Classifier Reveals Intrinsic and Extrinsic Contributions to Consensus Molecular Subtypes in Primary and Metastatic Colon Cancer. *Clinical cancer research : an official journal of the American Association for Cancer Research* **2019**;25(14):4431-42.
10. Roepman P, Schlicker A, Tabernero J, Majewski I, Tian S, Moreno V, *et al.* Colorectal cancer intrinsic subtypes predict chemotherapy benefit, deficient mismatch repair and epithelial-to-mesenchymal transition. *Int J Cancer* **2014**;134(3):552-62.
11. Shinto E, Oki E, Shimokawa M, Yamaguchi S, Ishiguro M, Morita M, *et al.* A Validation Study for Recurrence Risk Stratification of Stage II Colon Cancer Using the 55-Gene Classifier. *Oncology* **2020**:1-8.
12. Song N, Pogue-Geile KL, Gavin PG, Yothers G, Kim SR, Johnson NL, *et al.* Clinical Outcome From Oxaliplatin Treatment in Stage II/III Colon Cancer According to Intrinsic Subtypes: Secondary Analysis of NSABP C-07/NRG Oncology Randomized Clinical Trial. *JAMA Oncology* **2016**;2(9):1162-9.
13. Williams DS, Mouradov D, Jorissen RN, Newman MR, Amini E, Nickless DK, *et al.* Lymphocytic response to tumour and deficient DNA mismatch repair identify subtypes of stage II/III colorectal cancer associated with patient outcomes. *Gut* **2018**.
14. De Sousa EMF, Wang X, Jansen M, Fessler E, Trinh A, de Rooij LP, *et al.* Poor-prognosis colon cancer is defined by a molecularly distinct subtype and develops from serrated precursor lesions. *Nature Medicine* **2013**;19(5):614-8.
15. Guinney J, Dienstmann R, Wang X, de Reynies A, Schlicker A, Soneson C, *et al.* The consensus molecular subtypes of colorectal cancer. *Nature Medicine* **2015**;21(11):1350-6.
16. Cremolini C, Benelli M, Fontana E, Pagani F, Rossini D, Fuca G, *et al.* Benefit from anti-EGFRs in RAS and BRAF wild-type metastatic transverse colon cancer: a clinical and molecular proof of concept study. *ESMO Open* **2019**;4(2):e000489.
17. Del Rio M, Mollevi C, Bibeau F, Vie N, Selves J, Emile JF, *et al.* Molecular subtypes of metastatic colorectal cancer are associated with patient response to irinotecan-based therapies. *Eur J Cancer* **2017**;76:68-75.
18. Kawazoe A, Kuboki Y, Shinozaki E, Hara H, Nishina T, Komatsu Y, *et al.* Multicenter Phase I/II Trial of Napabucasin and Pembrolizumab in Patients with Metastatic Colorectal Cancer (EPOC1503/SCOOP Trial). *Clin Cancer Res* **2020**;26(22):5887-94.

19. Lenz H-J, Ou F-S, Venook AP, Hochster HS, Niedzwiecki D, Goldberg RM, *et al.* Impact of Consensus Molecular Subtype on Survival in Patients With Metastatic Colorectal Cancer: Results From CALGB/SWOG 80405 (Alliance). *Journal of clinical oncology : official journal of the American Society of Clinical Oncology* **2019**;37(22):1876-85.
20. Lenz HJ, Argiles G, Yoshino T, Tejpar S, Ciardiello F, Braunger J, *et al.* Association of Consensus Molecular Subtypes and Molecular Markers With Clinical Outcomes in Patients With Metastatic Colorectal Cancer: Biomarker Analyses From LUME-Colon 1. *Clin Colorectal Canc* **2020**;15:15.
21. Mooi JK, Wirapati P, Asher R, Lee CK, Savas P, Price TJ, *et al.* The prognostic impact of consensus molecular subtypes (CMS) and its predictive effects for bevacizumab benefit in metastatic colorectal cancer: molecular analysis of the AGITG MAX clinical trial. *Annals of oncology : official journal of the European Society for Medical Oncology* **2018**;29(11):2240-6.
22. Morris JS, Luthra R, Liu Y, Duose DY, Lee W, Reddy NG, *et al.* Development and Validation of a Gene Signature Classifier for Consensus Molecular Subtyping of Colorectal Carcinoma in a CLIA-Certified Setting. *Clin Cancer Res* **2020**;27:27.
23. Okita A, Takahashi S, Ouchi K, Inoue M, Watanabe M, Endo M, *et al.* Consensus molecular subtypes classification of colorectal cancer as a predictive factor for chemotherapeutic efficacy against metastatic colorectal cancer. *Oncotarget* **2018**;9(27):18698-711.
24. Schlicker A, Ellappalayam A, Beumer IJ, Snel MHJ, Mittempergher L, Diosdado B, *et al.* Investigating the concordance in molecular subtypes of primary colorectal tumors and their matched synchronous liver metastasis. *Int J Cancer* **2020** doi 10.1002/ijc.33003.
25. Stintzing S, Wirapati P, Lenz HJ, Neureiter D, Fischer von Weikersthal L, Decker T, *et al.* Consensus molecular subgroups (CMS) of colorectal cancer (CRC) and first-line efficacy of FOLFIRI plus cetuximab or bevacizumab in the FIRE3 (AIO KRK-0306) trial. *Ann Oncol* **2019**;30(11):1796-803 doi 10.1093/annonc/mdz387.
26. Trinh A, Trumpi K, De Sousa EMF, Wang X, de Jong JH, Fessler E, *et al.* Practical and Robust Identification of Molecular Subtypes in Colorectal Cancer by Immunohistochemistry. *Clin Cancer Res* **2017**;23(2):387-98.
27. Woolston A, Khan K, Spain G, Barber LJ, Griffiths B, Gonzalez-Exposito R, *et al.* Genomic and Transcriptomic Determinants of Therapy Resistance and Immune Landscape Evolution during Anti-EGFR Treatment in Colorectal Cancer. *Cancer Cell* **2019**;36(1):35-50.e9.
28. Marisa L, Ayadi M, Balogoun R, Pilati C, Malicot KL, Lepage C, *et al.* Clinical utility of colon cancer molecular subtypes: Validation of two main colorectal molecular classifications on the PETACC-8 phase III trial cohort. *J Clin Oncol* **2017**;35(15\_suppl):3509- doi 10.1200/JCO.2017.35.15\_suppl.3509.
29. Pogue-Geile KL, Andre T, Song N, Lipchik C, Wang Y, Kim RS, *et al.* Association of colon cancer (CC) molecular signatures with prognosis and oxaliplatin prediction-benefit in the MOSAIC Trial (Multicenter International Study of Oxaliplatin/5-FU-LV in the Adjuvant Treatment of Colon Cancer). *Journal of Clinical Oncology Conference* **2019**;37.
30. Borelli B, Fontana E, Giordano M, Antoniotti C, Bergamo F, Murgioni S, *et al.* Consensus molecular subtypes and CRC assigner classifications in metastatic colorectal cancer (mCRC): Prognostic and predictive impact in the TRIBE2 study. *J Clin Oncol* **2020**;38(15\_suppl):4016- doi 10.1200/JCO.2020.38.15\_suppl.4016.
31. Gomez OH, Soto VH, Machado I, Mendez MC, Cuatrecasas M, Horndler C, *et al.* Prognostic and predictive role of Consensus Molecular Subtypes (CMS) determined by immunohistochemistry in metastatic colorectal cancer (mCRC). *Ann Oncol* **2020**;31:S442-S3.
32. Lam M, Marie PK, Sarshekeh AM, Morris VK, Duose DY, Zhang B, *et al.* Consensus molecular subtypes (CMS) as a marker for treatment and disease biology in metastatic colorectal cancer (CRC). *J Clin Oncol* **2020**;38(15\_suppl):4089- doi 10.1200/JCO.2020.38.15\_suppl.4089.
33. Lee MS, Selitsky SR, Parker JS, Auman JT, Wu Y, Hammond K, *et al.* Association of consensus molecular subtypes (CMS) with time to progression (TTP), progression free survival (PFS), and overall survival (OS) with second-line FOLFIRI +/- regorafenib in metastatic colorectal cancer (mCRC). *Journal of Clinical Oncology Conference* **2019**;37.
34. Sarshekeh AM, Lam M, Zorrilla IR, Holliday EB, Das P, Kee BK, *et al.* Consensus molecular subtype (CMS) as a novel integral biomarker in colorectal cancer: A phase II trial of bintrafusp alfa in CMS4 metastatic CRC. *J Clin Oncol* **2020**;38(15\_suppl):4084- doi 10.1200/JCO.2020.38.15\_suppl.4084.
35. Yuki S, Gamoh M, Denda T, Takashima A, Takahashi S, Nakamura M, *et al.* Analysis of consensus molecular subtypes (CMS) classification in the TRICOLORE trial: A randomized

phase III trial of S-1 and irinotecan (IRI) plus bevacizumab (Bmab) versus mFOLFOX6 or CapeOX plus Bmab as first-line treatment for metastatic colorectal cancer (mCRC). *Journal of Clinical Oncology Conference* **2020**;38(4).
